# Supplementary material for: Lithium and aluminium complexes supported by chelating phosphaguanidinates
Source: Royal Society of Chemistry journal article supplement (doi:10.1039/b506332a), 2005-01-01

# Supplementary Material

---

## Lithium and Aluminium Complexes Supported by Chelating Phosphaguanidines

---

Natalie E. Mansfield, Martyn P. Coles\* and Peter B. Hitchcock

*The Department of Chemistry, University of Sussex, Falmer, Brighton BN1 9QJ, UK. Fax: 01273 677196; Tel: 01273 877339; email: m.p.coles@sussex.ac.uk*

### Page

|    |         |                                                                                                                                         |
|----|---------|-----------------------------------------------------------------------------------------------------------------------------------------|
| 2  | Fig. 1a | $^1\text{H}$ NMR spectrum of $\text{Li}(\text{Ph}_2\text{PC}\{\text{N}^i\text{Pr}\}_2(\text{THF})_n$ ( <b>2a</b> ) at 293 K             |
| 3  | Fig. 1b | $^{31}\text{P}$ NMR spectrum of $\text{Li}(\text{Ph}_2\text{PC}\{\text{N}^i\text{Pr}\}_2(\text{THF})_n$ ( <b>2a</b> ) at 223 K          |
| 4  | Fig. 2a | $^1\text{H}$ NMR spectrum of $\text{Li}(\text{Ph}_2\text{PC}\{\text{N}^i\text{Pr}\}_2(\text{TMEDA})$ ( <b>3a</b> ) at 368 K             |
| 5  | Fig. 2b | $^{31}\text{P}$ NMR spectra of $\text{Li}(\text{Ph}_2\text{PC}\{\text{N}^i\text{Pr}\}_2(\text{TMEDA})$ ( <b>3a</b> ) at 368 K and 183 K |
| 6  | Fig. 2c | $^7\text{Li}$ NMR spectra of $\text{Li}(\text{Ph}_2\text{PC}\{\text{N}^i\text{Pr}\}_2(\text{TMEDA})$ ( <b>3a</b> ) at 368 K and 183 K   |
| 7  | Fig 3a  | $^1\text{H}$ NMR spectrum of $\text{Al}(\text{Ph}_2\text{PC}\{\text{N}^i\text{Pr}\}_2)\text{Me}_2$ ( <b>4a</b> )                        |
| 8  | Fig 3b  | $^{13}\text{C}$ NMR spectrum of $\text{Al}(\text{Ph}_2\text{PC}\{\text{N}^i\text{Pr}\}_2)\text{Me}_2$ ( <b>4a</b> )                     |
| 9  | Fig 3c  | $^{31}\text{P}$ NMR spectrum of $\text{Al}(\text{Ph}_2\text{PC}\{\text{N}^i\text{Pr}\}_2)\text{Me}_2$ ( <b>4a</b> )                     |
| 10 | Fig 4a  | $^1\text{H}$ NMR spectrum of $\text{Al}(\text{Ph}_2\text{PC}\{\text{NCy}\}_2)\text{Me}_2$ ( <b>4b</b> )                                 |
| 11 | Fig 4b  | $^{13}\text{C}$ NMR spectrum of $\text{Al}(\text{Ph}_2\text{PC}\{\text{NCy}\}_2)\text{Me}_2$ ( <b>4b</b> )                              |
| 12 | Fig 4c  | $^{31}\text{P}$ NMR spectrum of $\text{Al}(\text{Ph}_2\text{PC}\{\text{NCy}\}_2)\text{Me}_2$ ( <b>4b</b> )                              |
| 13 | Fig 5a  | $^1\text{H}$ NMR spectrum of $\text{Al}(\text{Ph}_2\text{PC}\{\text{N}^i\text{Pr}\}_2)\text{Et}_2$ ( <b>5a</b> )                        |
| 14 | Fig 5b  | $^{13}\text{C}$ NMR spectrum of $\text{Al}(\text{Ph}_2\text{PC}\{\text{N}^i\text{Pr}\}_2)\text{Et}_2$ ( <b>5a</b> )                     |
| 15 | Fig 5c  | $^{31}\text{P}$ NMR spectrum of $\text{Al}(\text{Ph}_2\text{PC}\{\text{N}^i\text{Pr}\}_2)\text{Et}_2$ ( <b>5a</b> )                     |
| 16 | Fig 6a  | $^1\text{H}$ NMR spectrum of $\text{Al}(\text{Ph}_2\text{PC}\{\text{NCy}\}_2)\text{Et}_2$ ( <b>5b</b> )                                 |
| 17 | Fig 6b  | $^{13}\text{C}$ NMR spectrum of $\text{Al}(\text{Ph}_2\text{PC}\{\text{NCy}\}_2)\text{Et}_2$ ( <b>5b</b> )                              |
| 18 | Fig 6c  | $^{31}\text{P}$ NMR spectrum of $\text{Al}(\text{Ph}_2\text{PC}\{\text{NCy}\}_2)\text{Et}_2$ ( <b>5b</b> )                              |
| 19 | Fig 7a  | $^1\text{H}$ NMR spectrum of $\text{Al}(\text{Ph}_2\text{PC}\{\text{N}^i\text{Pr}\}_2)^i\text{Bu}_2$ ( <b>6a</b> )                      |
| 20 | Fig 7b  | $^{13}\text{C}$ NMR spectrum of $\text{Al}(\text{Ph}_2\text{PC}\{\text{N}^i\text{Pr}\}_2)^i\text{Bu}_2$ ( <b>6a</b> )                   |
| 21 | Fig 7c  | $^{31}\text{P}$ NMR spectrum of $\text{Al}(\text{Ph}_2\text{PC}\{\text{N}^i\text{Pr}\}_2)^i\text{Bu}_2$ ( <b>6a</b> )                   |
| 22 | Fig 8a  | $^1\text{H}$ NMR spectrum of $\text{Al}(\text{Ph}_2\text{PC}\{\text{NCy}\}_2)^i\text{Bu}_2$ ( <b>6b</b> )                               |
| 23 | Fig 8b  | $^{13}\text{C}$ NMR spectrum of $\text{Al}(\text{Ph}_2\text{PC}\{\text{NCy}\}_2)^i\text{Bu}_2$ ( <b>6b</b> )                            |
| 24 | Fig 8c  | $^{31}\text{P}$ NMR spectrum of $\text{Al}(\text{Ph}_2\text{PC}\{\text{NCy}\}_2)^i\text{Bu}_2$ ( <b>6b</b> )                            |
| 25 | Fig 9a  | $^1\text{H}$ NMR spectrum of $\text{Al}(\text{Ph}_2\text{PC}\{\text{N}^i\text{Pr}\}_2)\text{Ph}_2$ ( <b>7a</b> )                        |
| 26 | Fig 9b  | $^{13}\text{C}$ NMR spectrum of $\text{Al}(\text{Ph}_2\text{PC}\{\text{N}^i\text{Pr}\}_2)\text{Ph}_2$ ( <b>7a</b> )                     |
| 27 | Fig 9c  | $^{31}\text{P}$ NMR spectrum of $\text{Al}(\text{Ph}_2\text{PC}\{\text{N}^i\text{Pr}\}_2)\text{Ph}_2$ ( <b>7a</b> )                     |

Figure 1a  $^1\text{H}$  NMR spectrum of  $\text{Li}(\text{Ph}_2\text{PC}\{\text{N}^i\text{Pr}\}_2(\text{THF})_n$  (**2a**) at 293 K

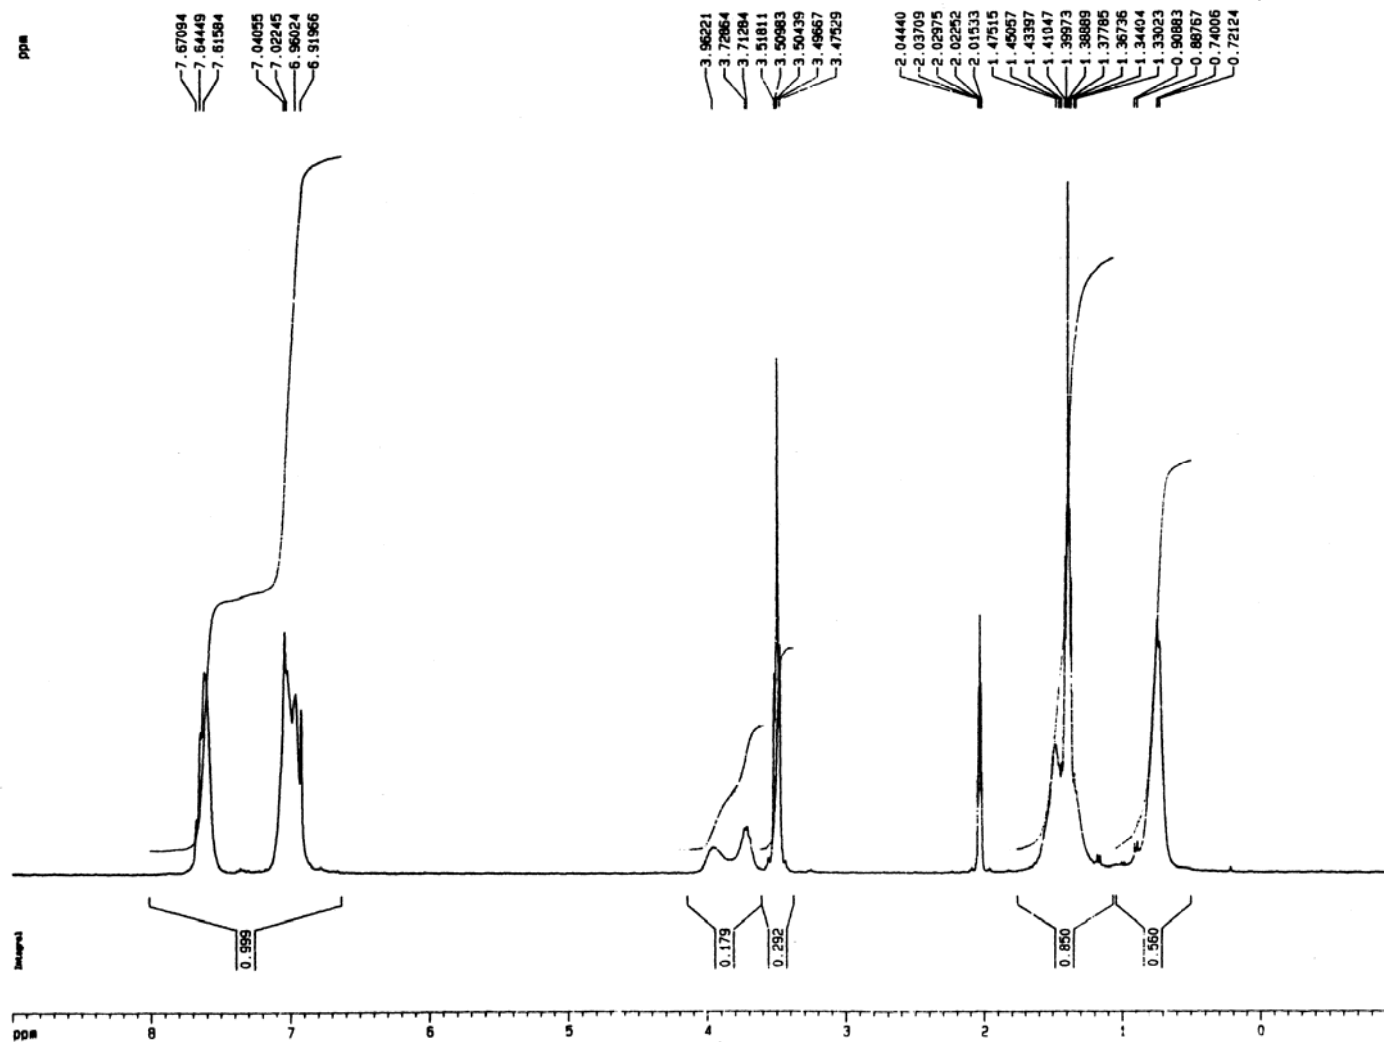

**Figure 1b**  $^{31}\text{P}$  NMR spectrum of  $\text{Li}(\text{Ph}_2\text{PC}\{\text{N}^i\text{Pr}\}_2)(\text{THF})_n$  (**2a**) at 223 K

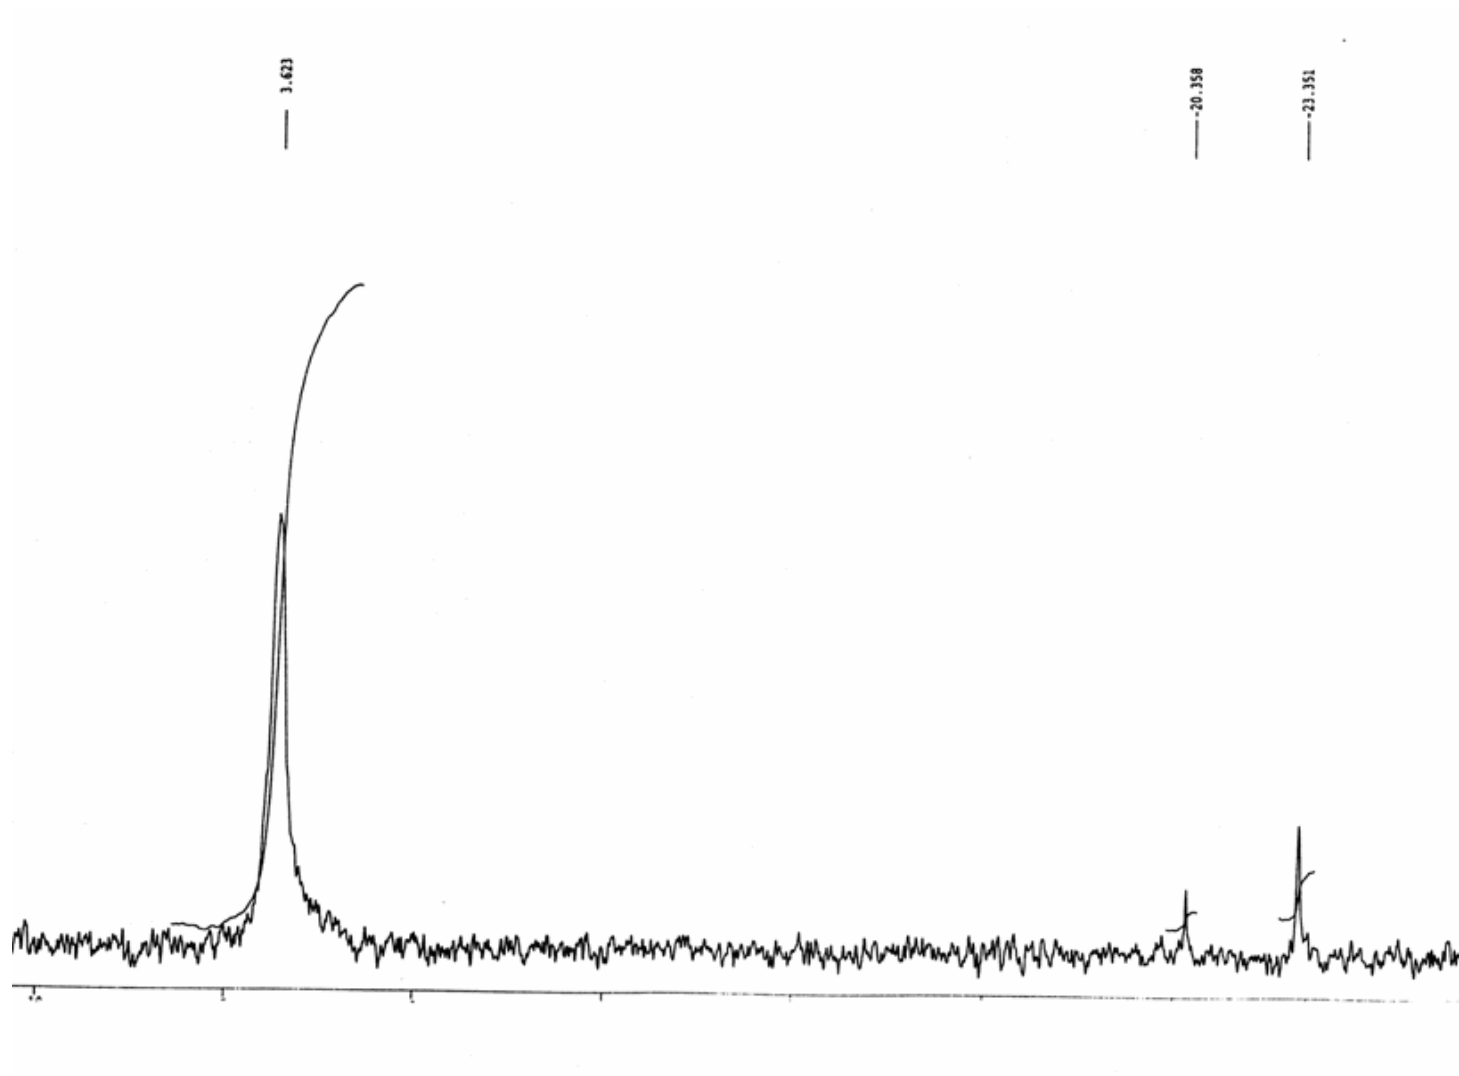

**Figure 2a**  $^1\text{H}$  NMR spectrum of  $\text{Li}(\text{Ph}_2\text{PC}\{\text{N}^i\text{Pr}\}_2)(\text{TMEDA})$  (**3a**) at 368 K

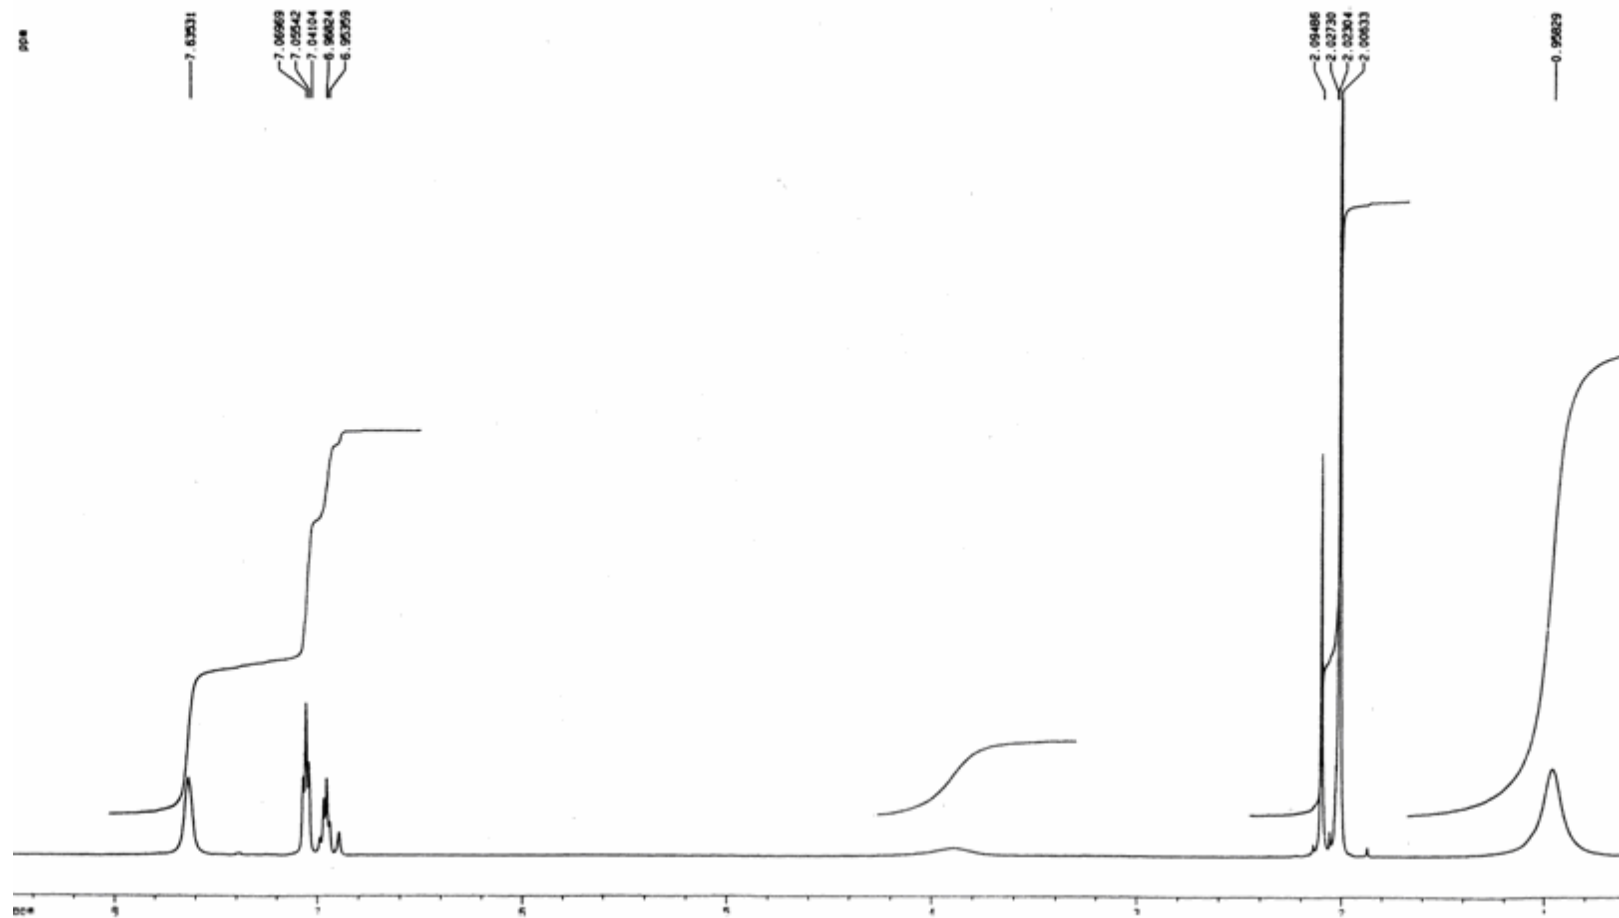

**Figure 2b**  $^{31}\text{P}$  NMR spectrum of  $\text{Li}(\text{Ph}_2\text{PC}\{\text{N}^i\text{Pr}\}_2(\text{TMEDA}))$  (**3a**) at 368 K and 183 K.

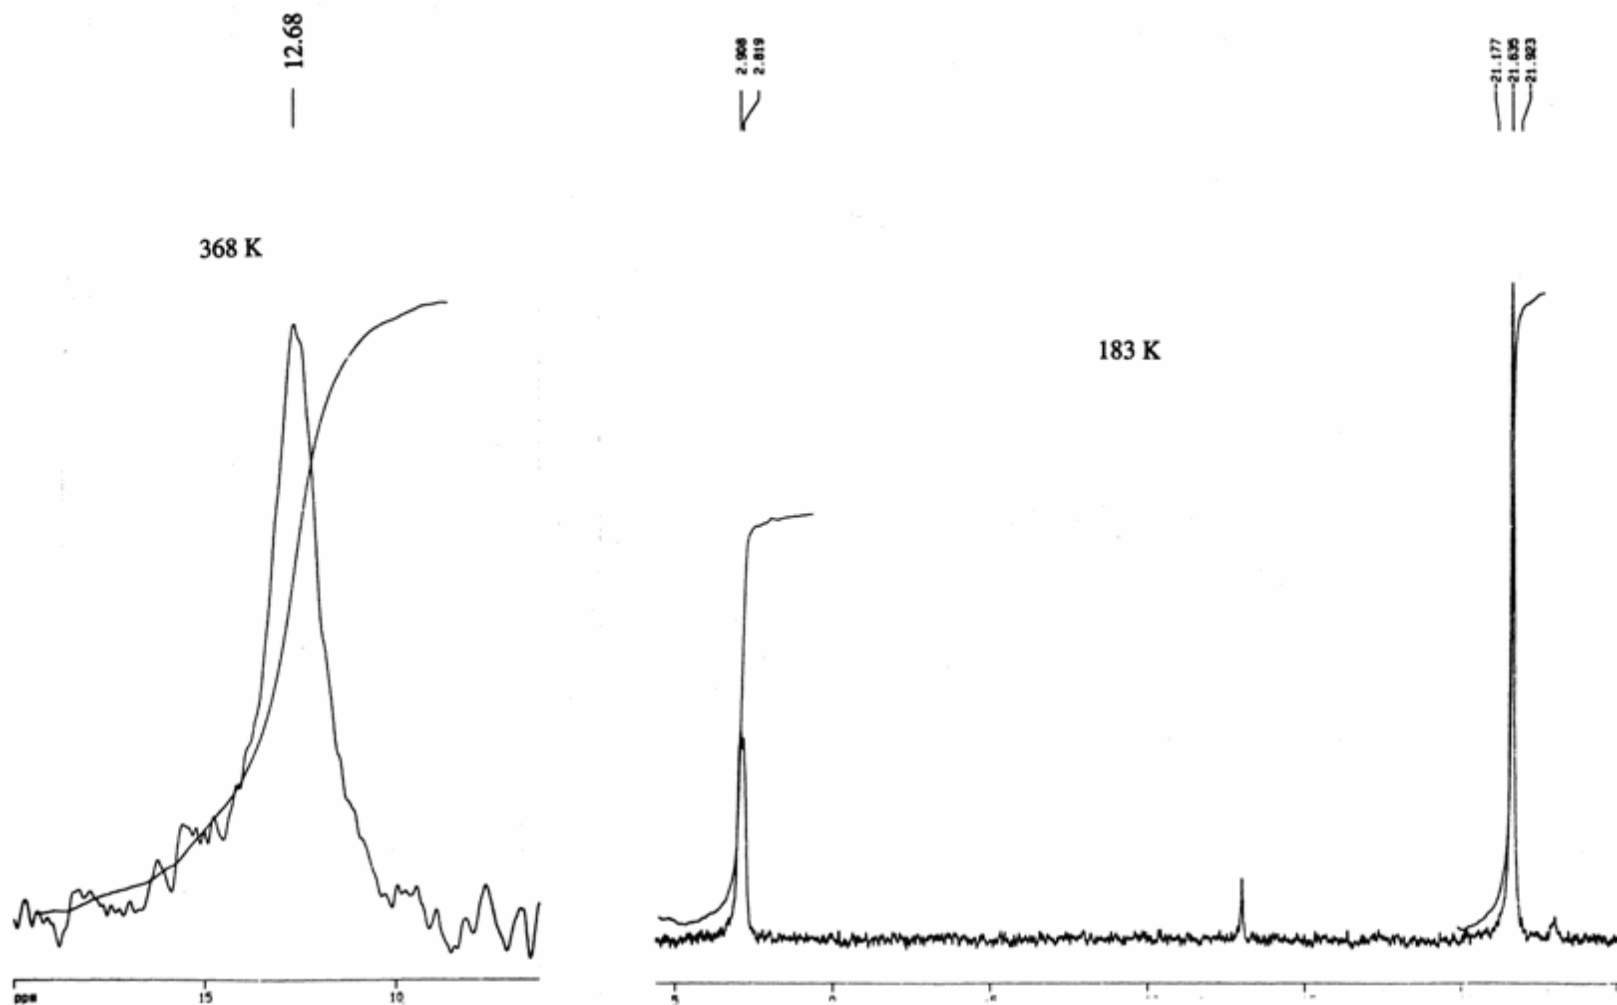

**Figure 2c**  $^7\text{Li}$  NMR spectrum of  $\text{Li}(\text{Ph}_2\text{PC}\{\text{N}^i\text{Pr}\}_2(\text{TMEDA}))$  (**3a**) at 368 K and 183 K.

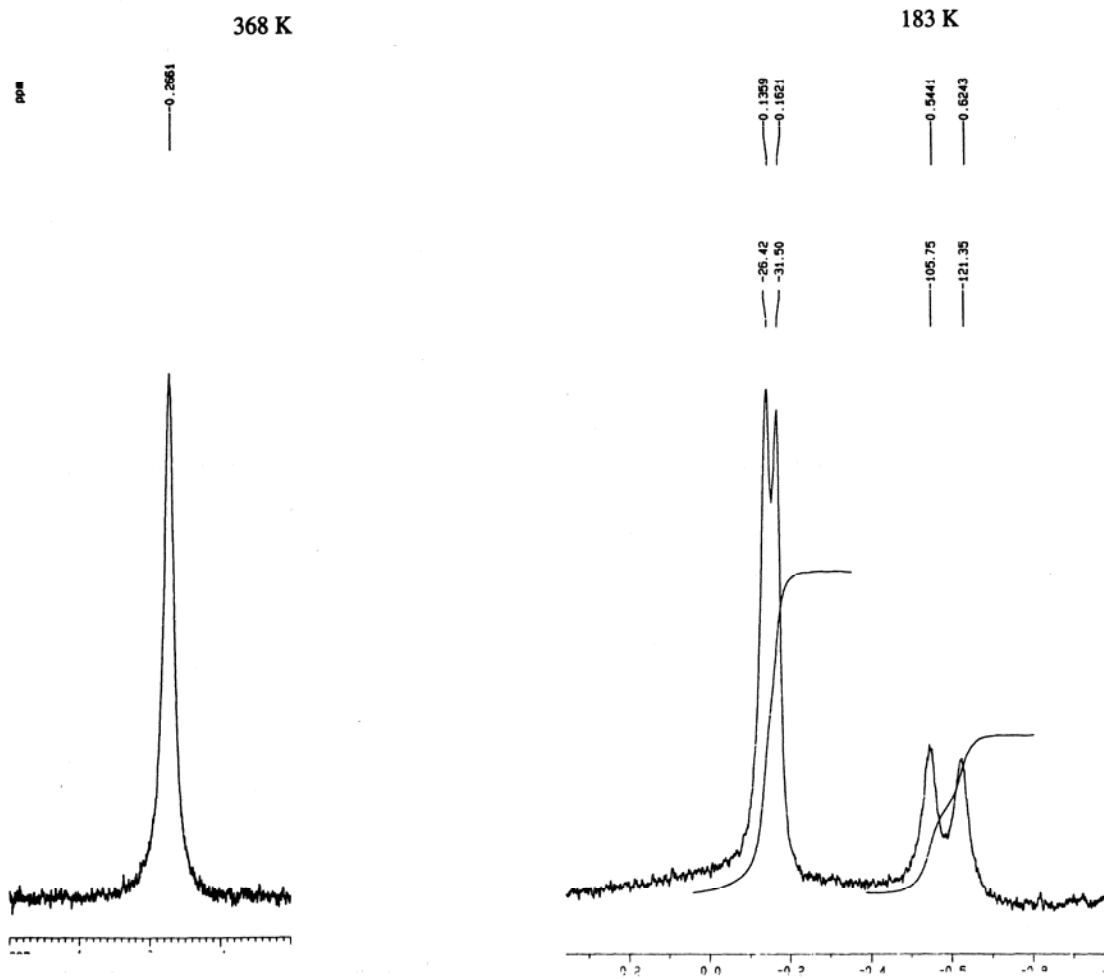

**Figure 3a**  $^1\text{H}$  NMR spectrum of  $\text{Al}(\text{Ph}_2\text{PC}\{\text{N}^i\text{Pr}\}_2)\text{Me}_2$  (**4a**)

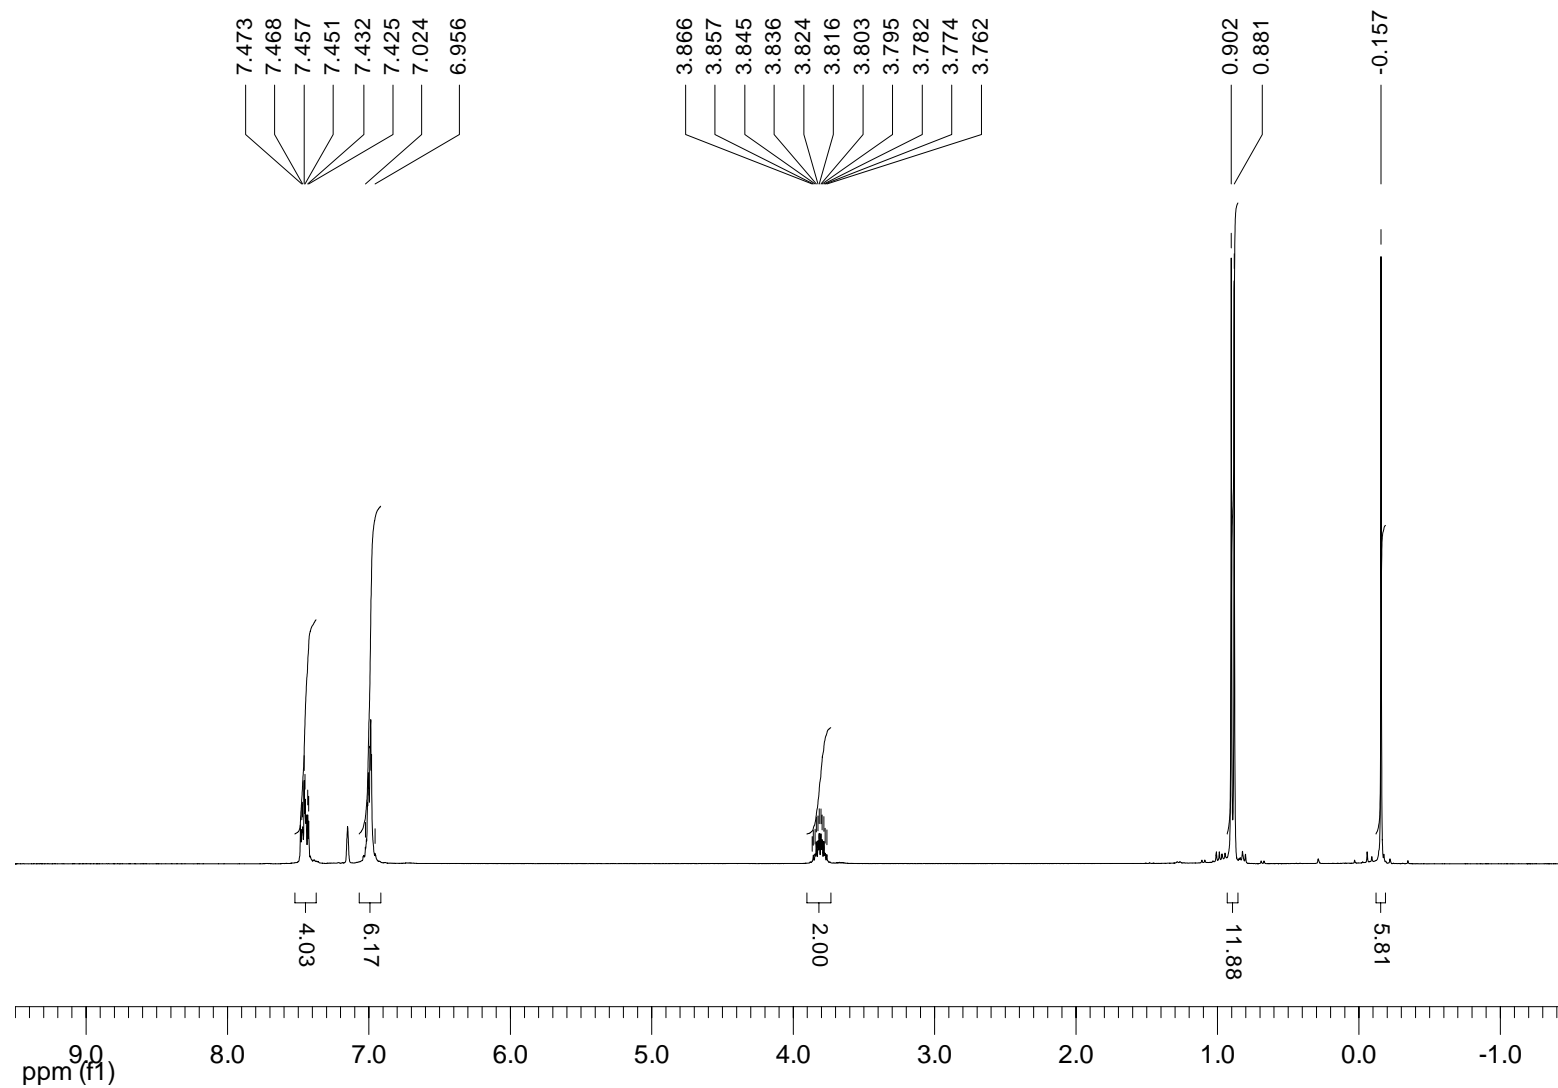

**Figure 3b**  $^{13}\text{C}$  NMR spectrum of  $\text{Al}(\text{Ph}_2\text{PC}\{\text{N}^i\text{Pr}\}_2)\text{Me}_2$  (**4a**)

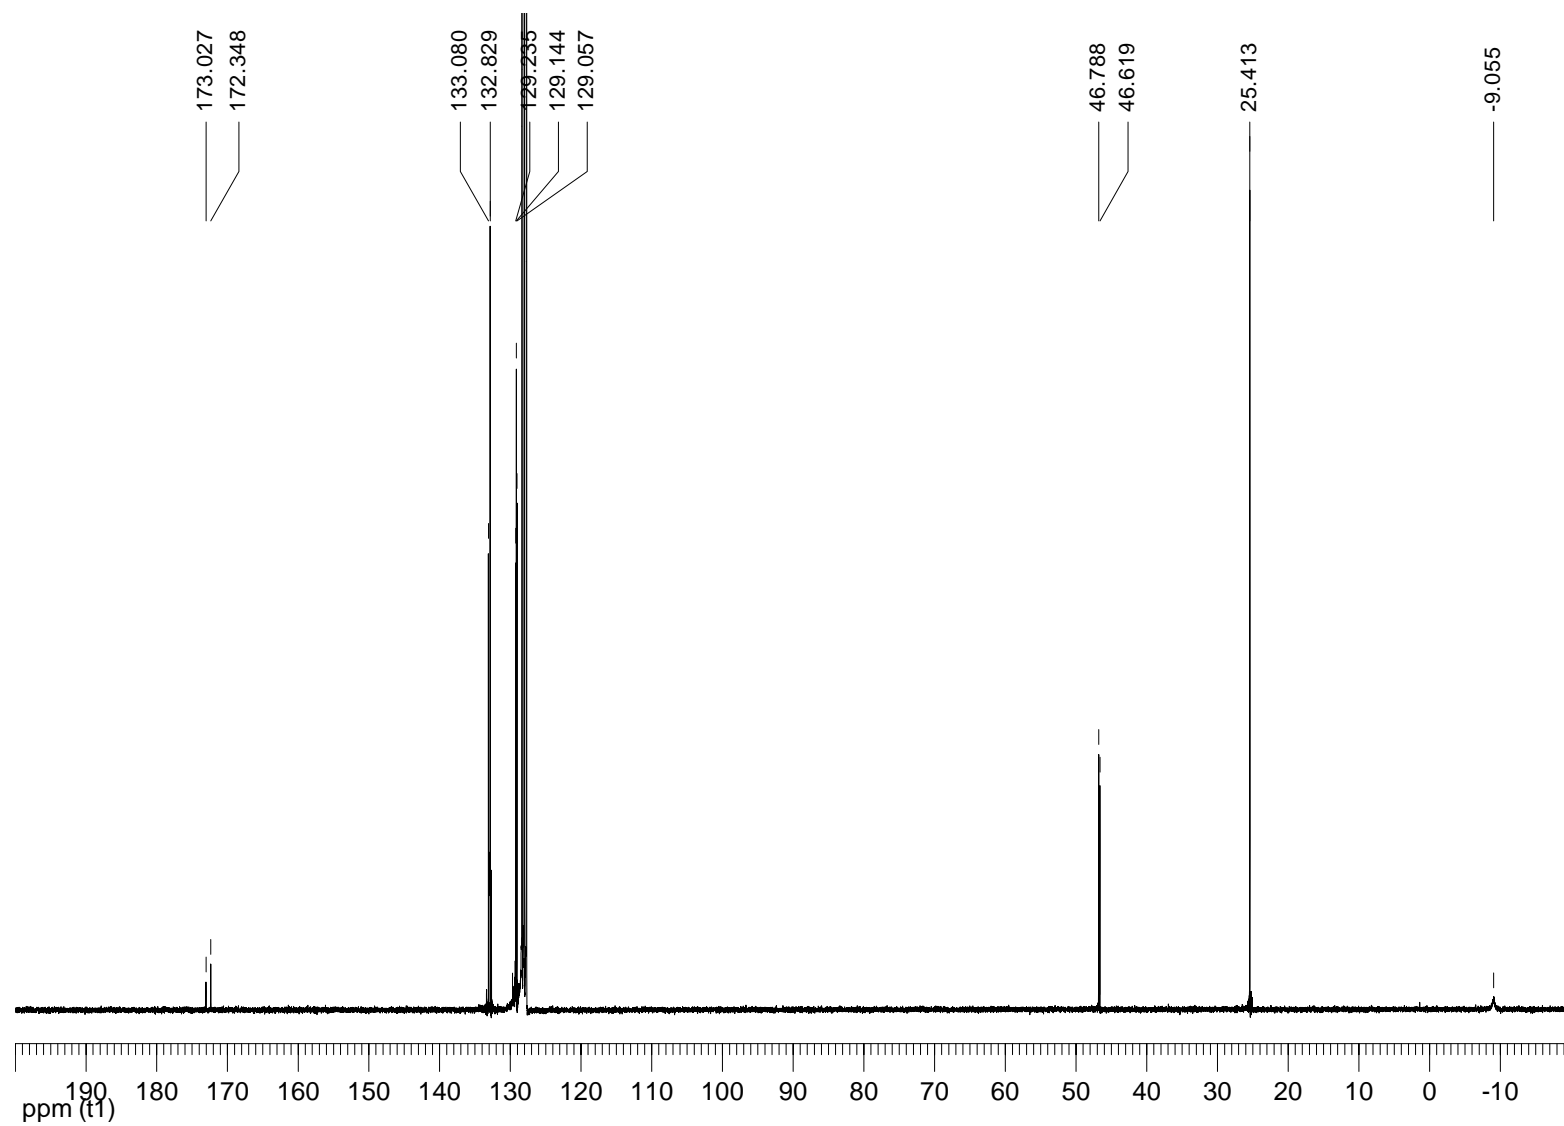



**Figure 3c**  $^{31}\text{P}$  NMR spectrum of  $\text{Al}(\text{Ph}_2\text{PC}\{\text{N}^i\text{Pr}\}_2)\text{Me}_2$  (**4a**)

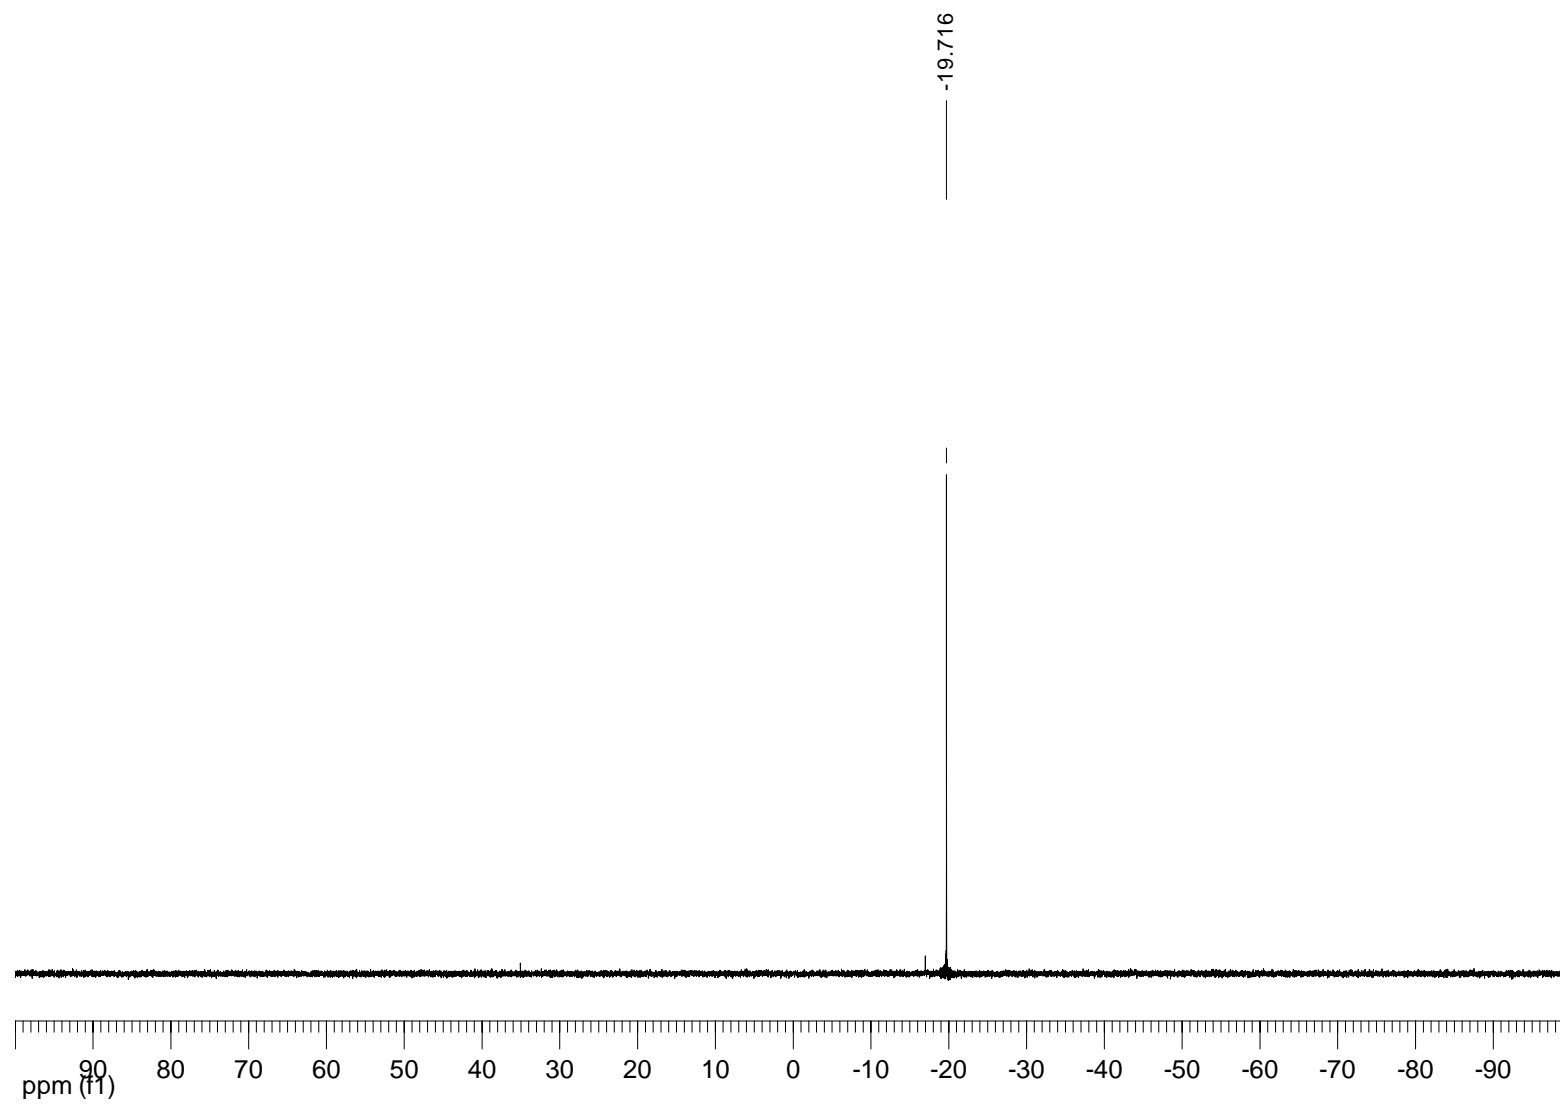

**Figure 4a**  $^1\text{H}$  NMR spectrum of  $\text{Al}(\text{Ph}_2\text{PC}\{\text{NCy}\}_2)\text{Me}_2$  (**4b**) (residual  $\text{AlMe}_3$  at  $\delta$  -0.310)

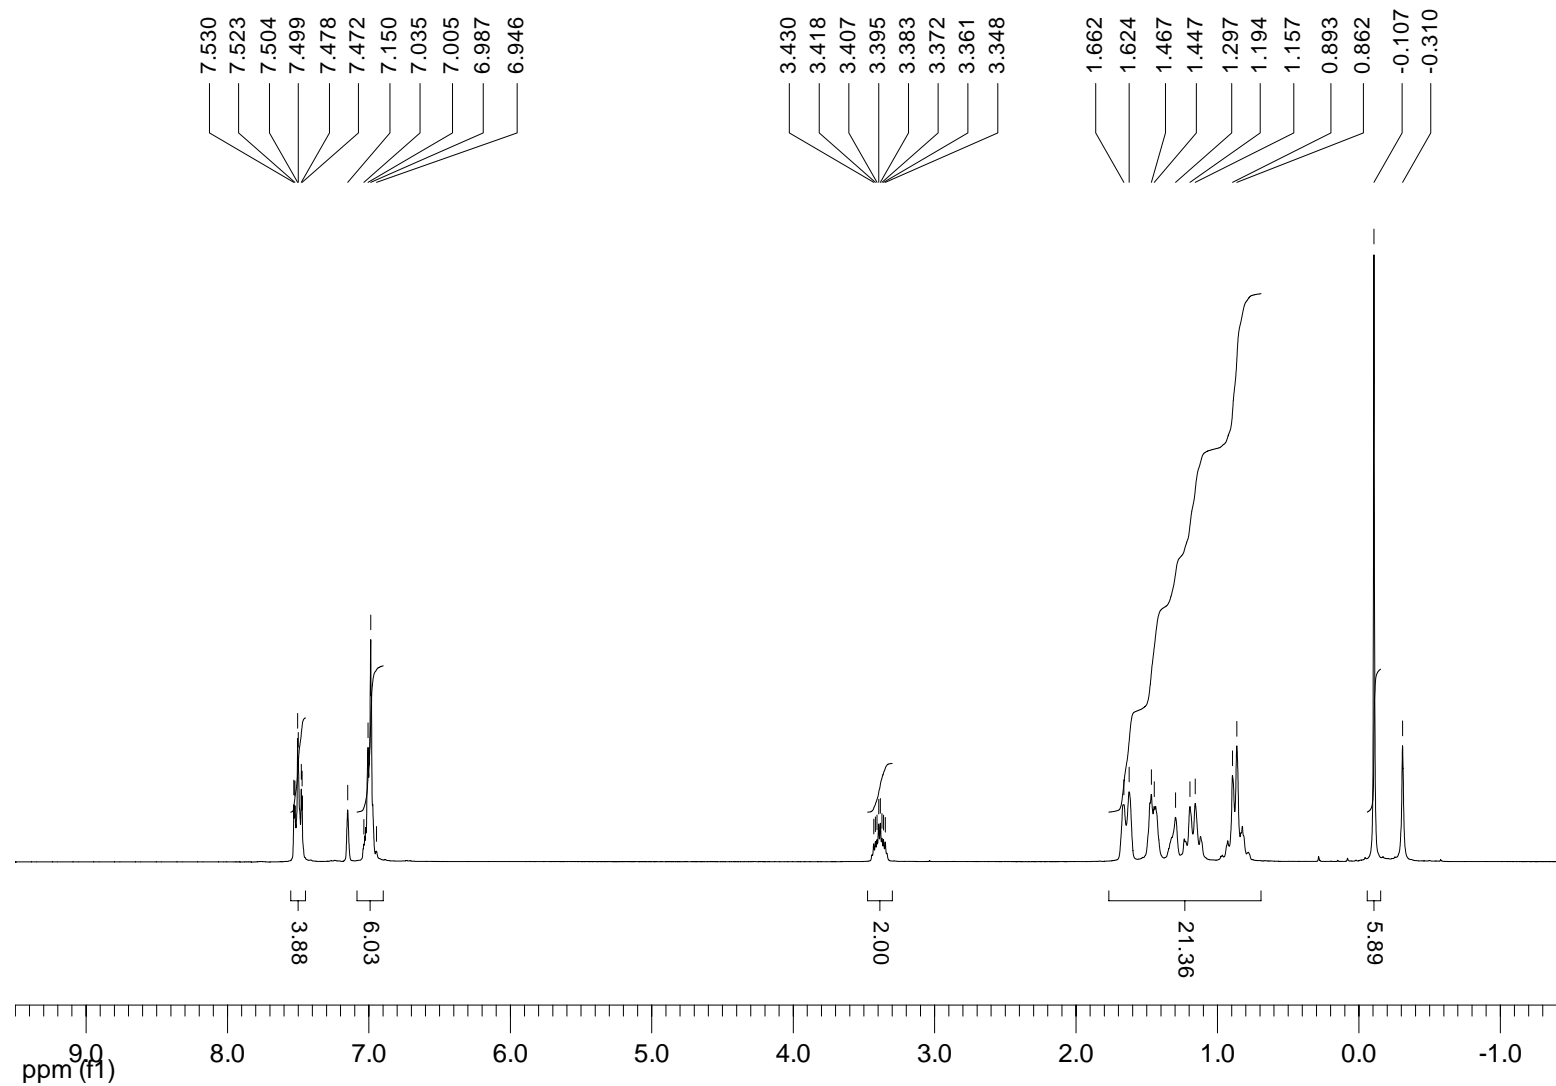

**Figure 4b**  $^{13}\text{C}$  NMR spectrum of  $\text{Al}(\text{Ph}_2\text{PC}\{\text{NCy}\}_2)\text{Me}_2$  (**4b**) (residual  $\text{AlMe}_3$  at  $\delta$  -6.847)

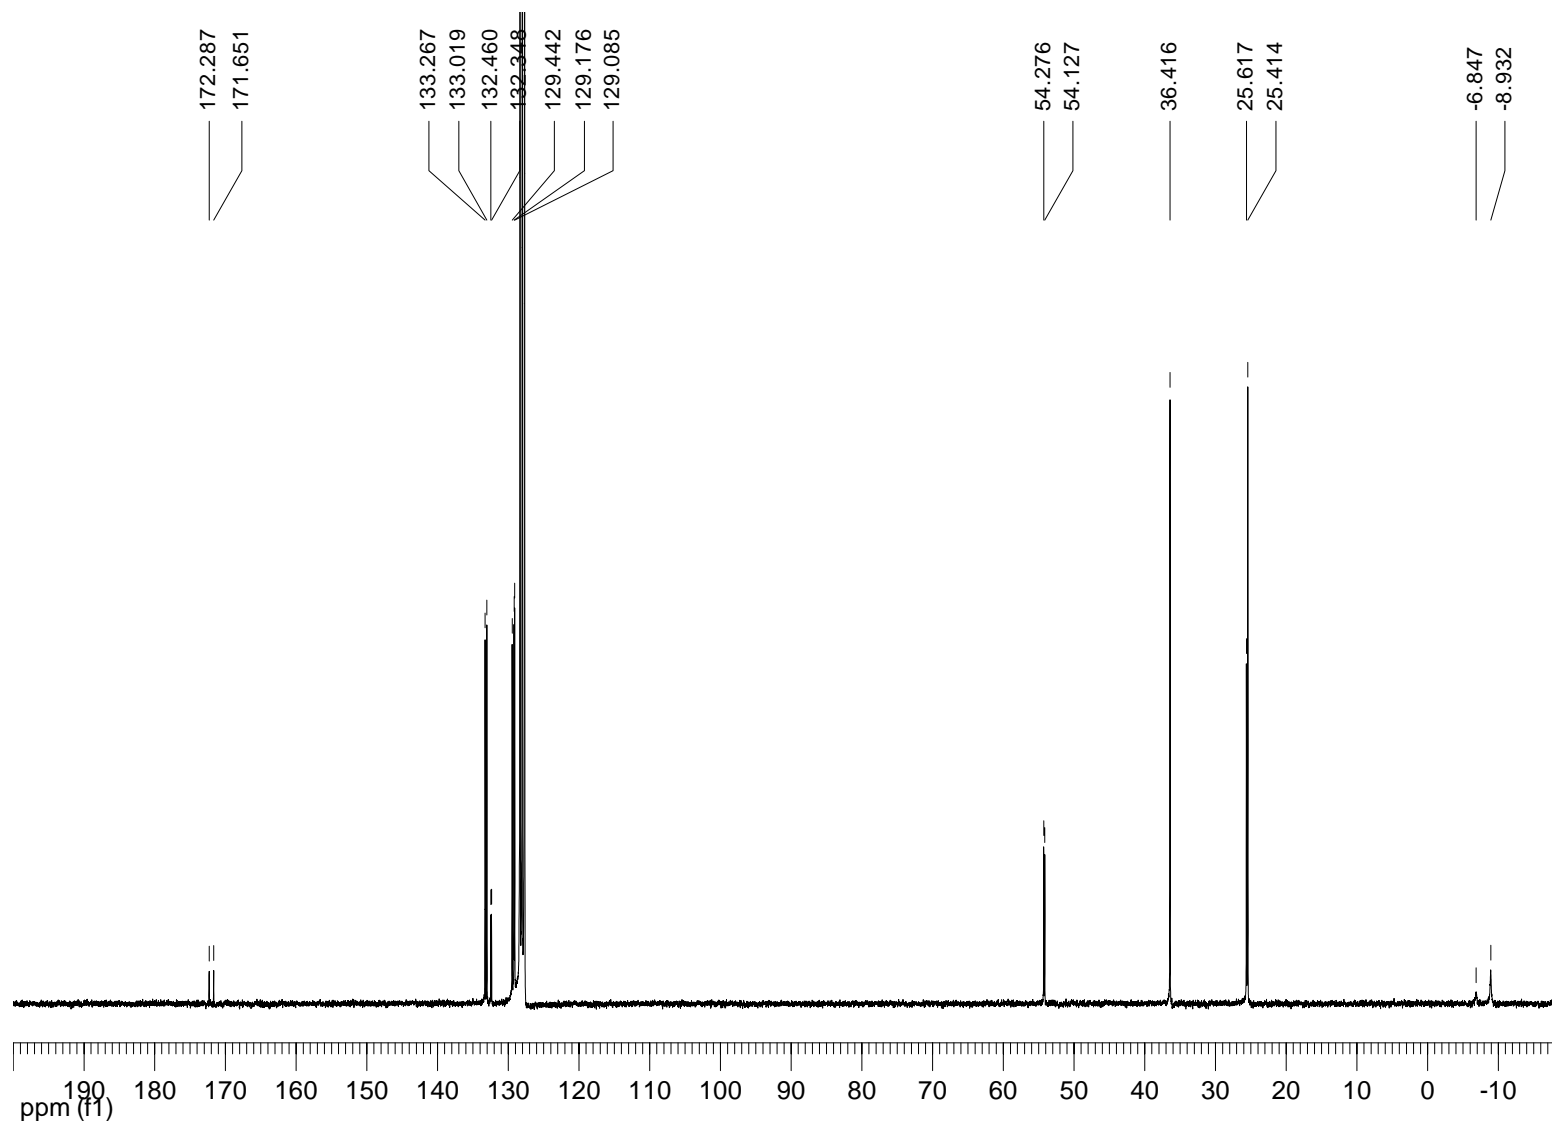

**Figure 4c**  $^{31}\text{P}$  NMR spectrum of  $\text{Al}(\text{Ph}_2\text{PC}\{\text{NCy}\}_2)\text{Me}_2$  (**4b**)

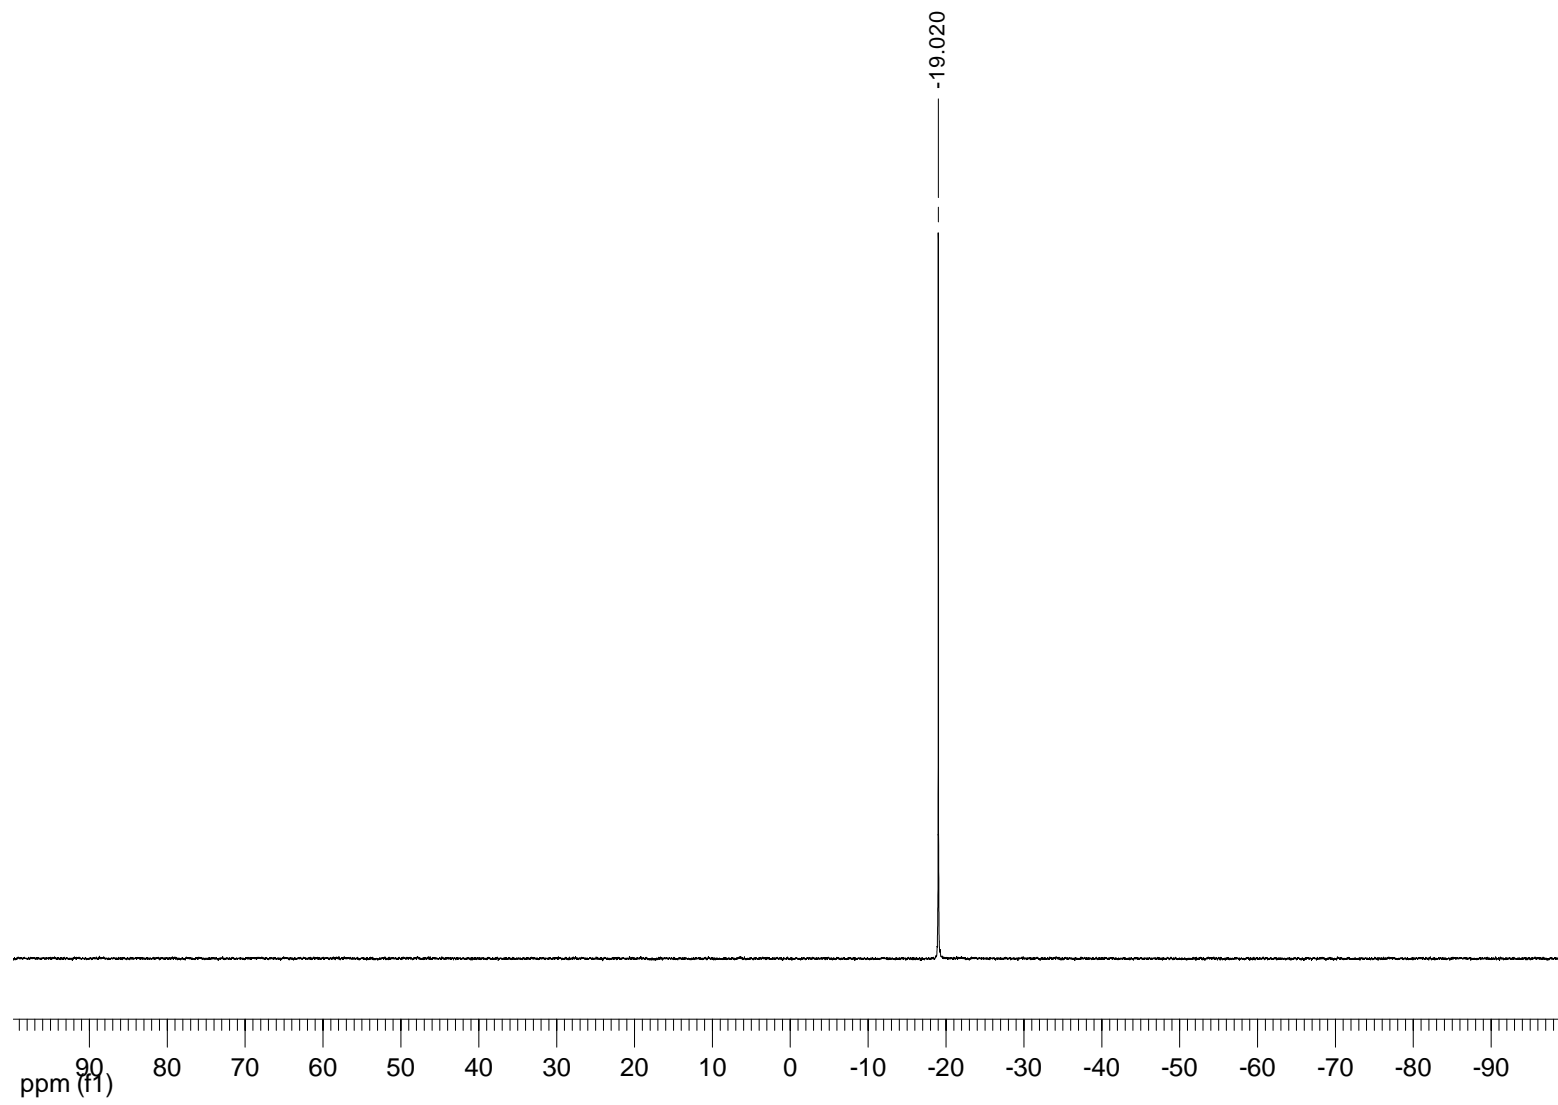

**Figure 5a**  $^1\text{H}$  NMR spectrum of  $\text{Al}(\text{Ph}_2\text{PC}\{\text{N}^i\text{Pr}\}_2)\text{Et}_2$  (**5a**)

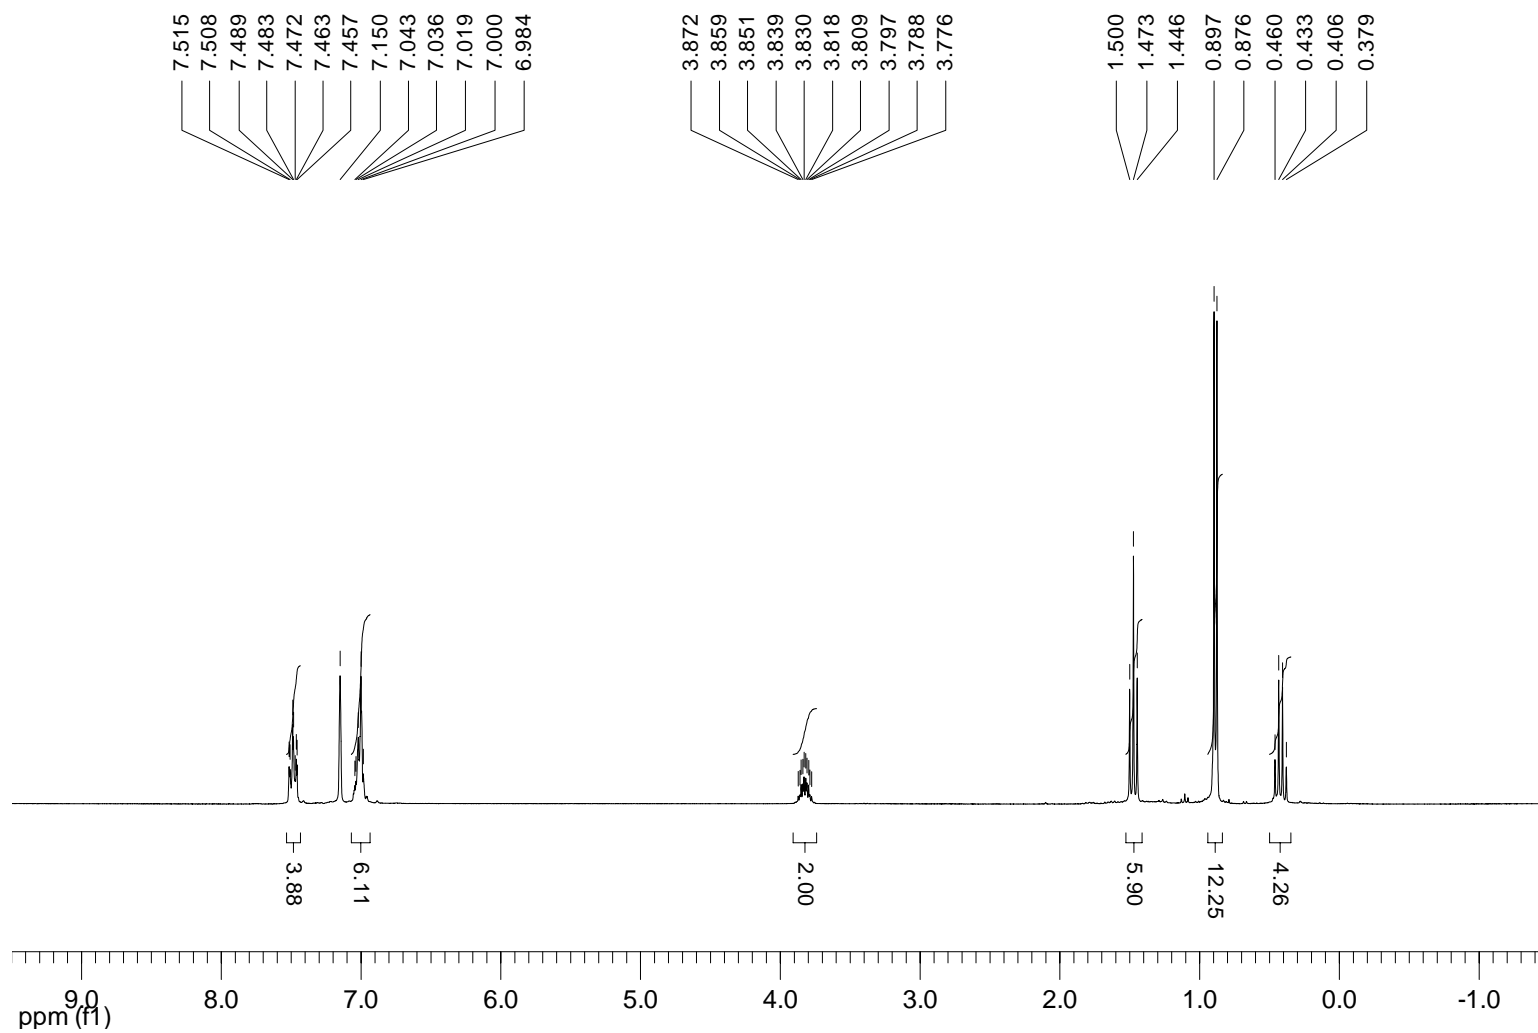

**Figure 5b**  $^{13}\text{C}$  NMR spectrum of  $\text{Al}(\text{Ph}_2\text{PC}\{\text{N}^i\text{Pr}\}_2)\text{Et}_2$  (**5a**)

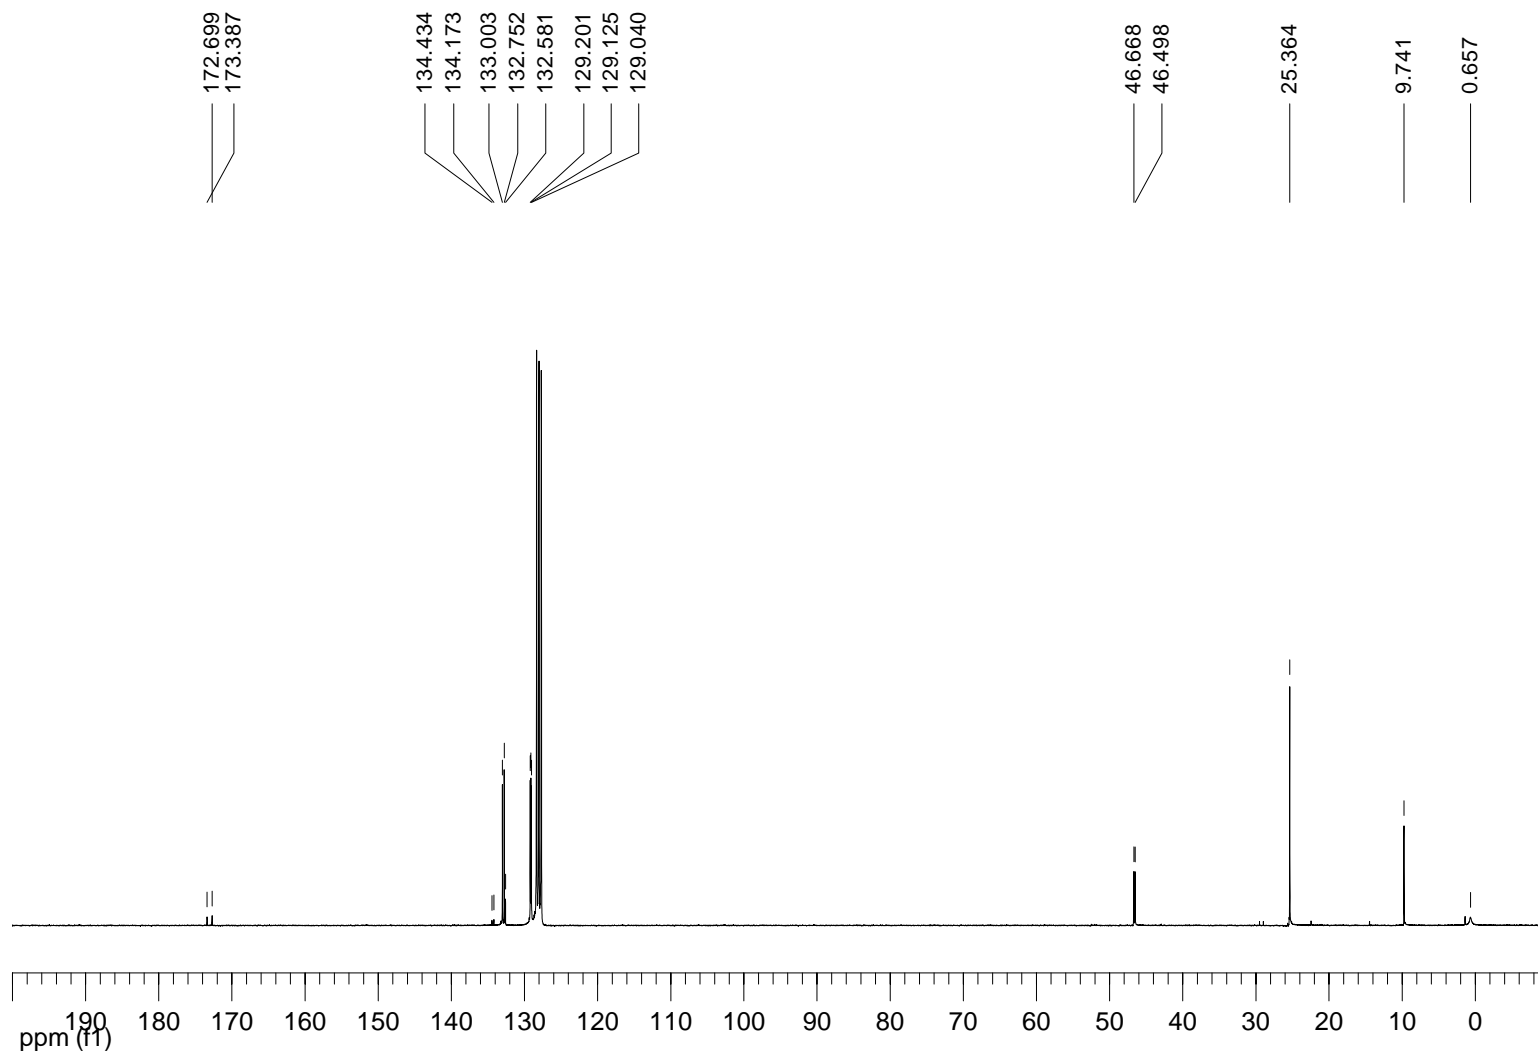

**Figure 5c**  $^{31}\text{P}$  NMR spectrum of  $\text{Al}(\text{Ph}_2\text{PC}\{\text{N}^i\text{Pr}\}_2)\text{Et}_2$  (**5a**)

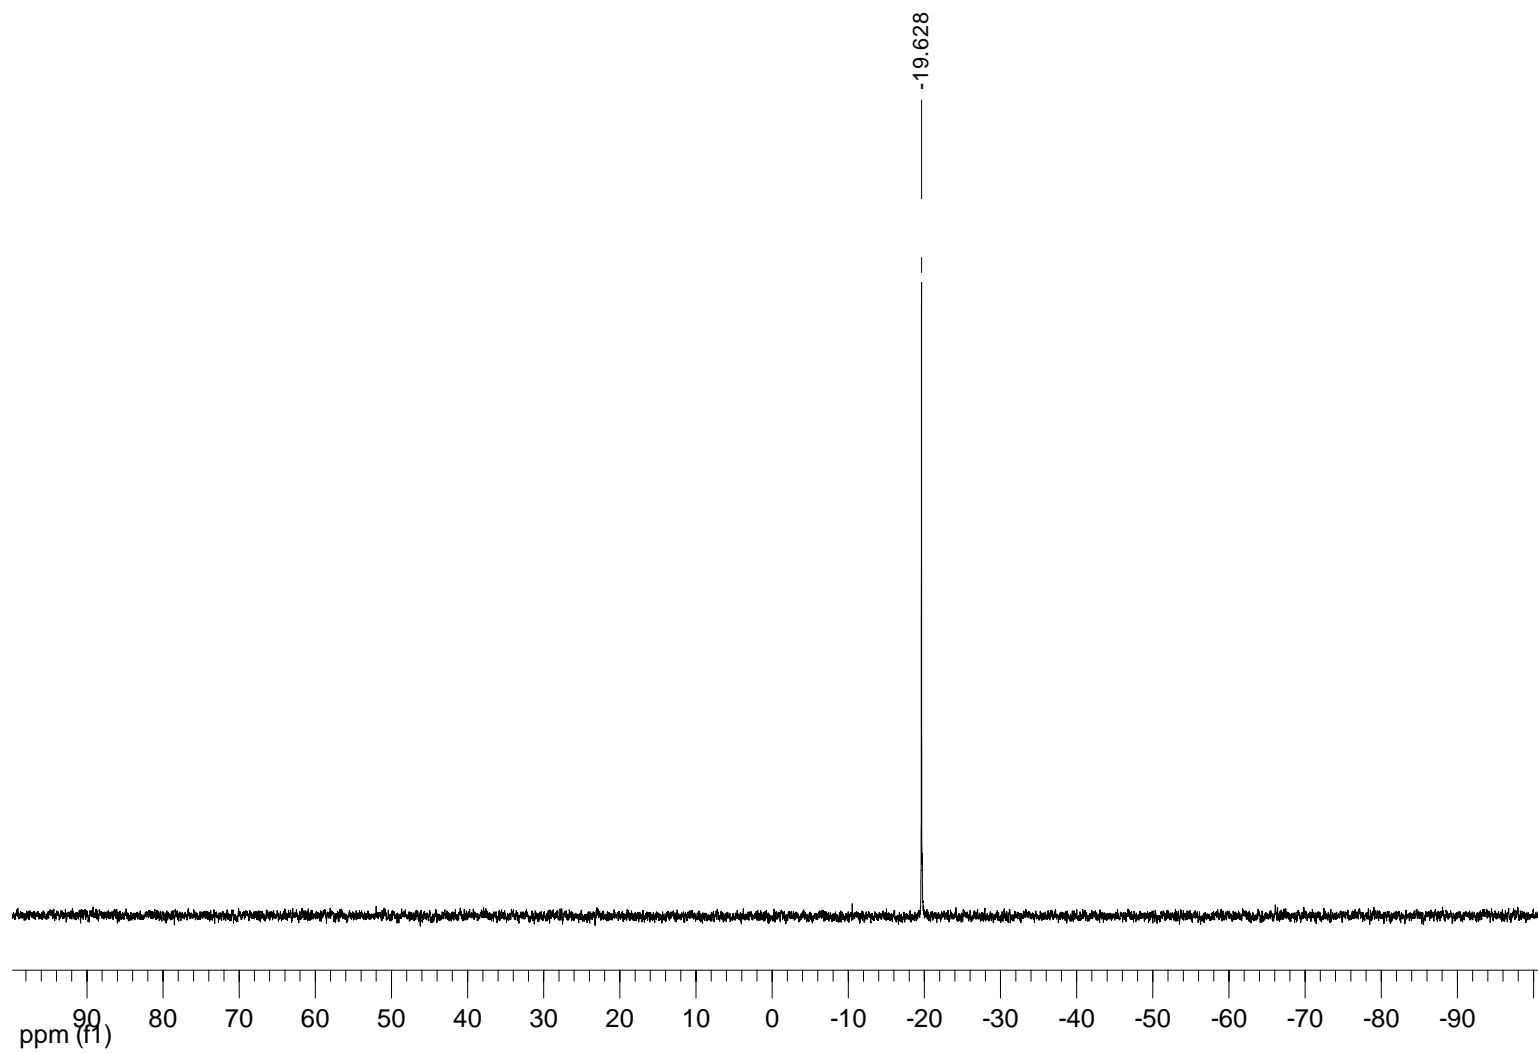

**Figure 6a**  $^1\text{H}$  NMR spectrum of  $\text{Al}(\text{Ph}_2\text{PC}(\text{NCy})_2)\text{Et}_2$  (**5b**)

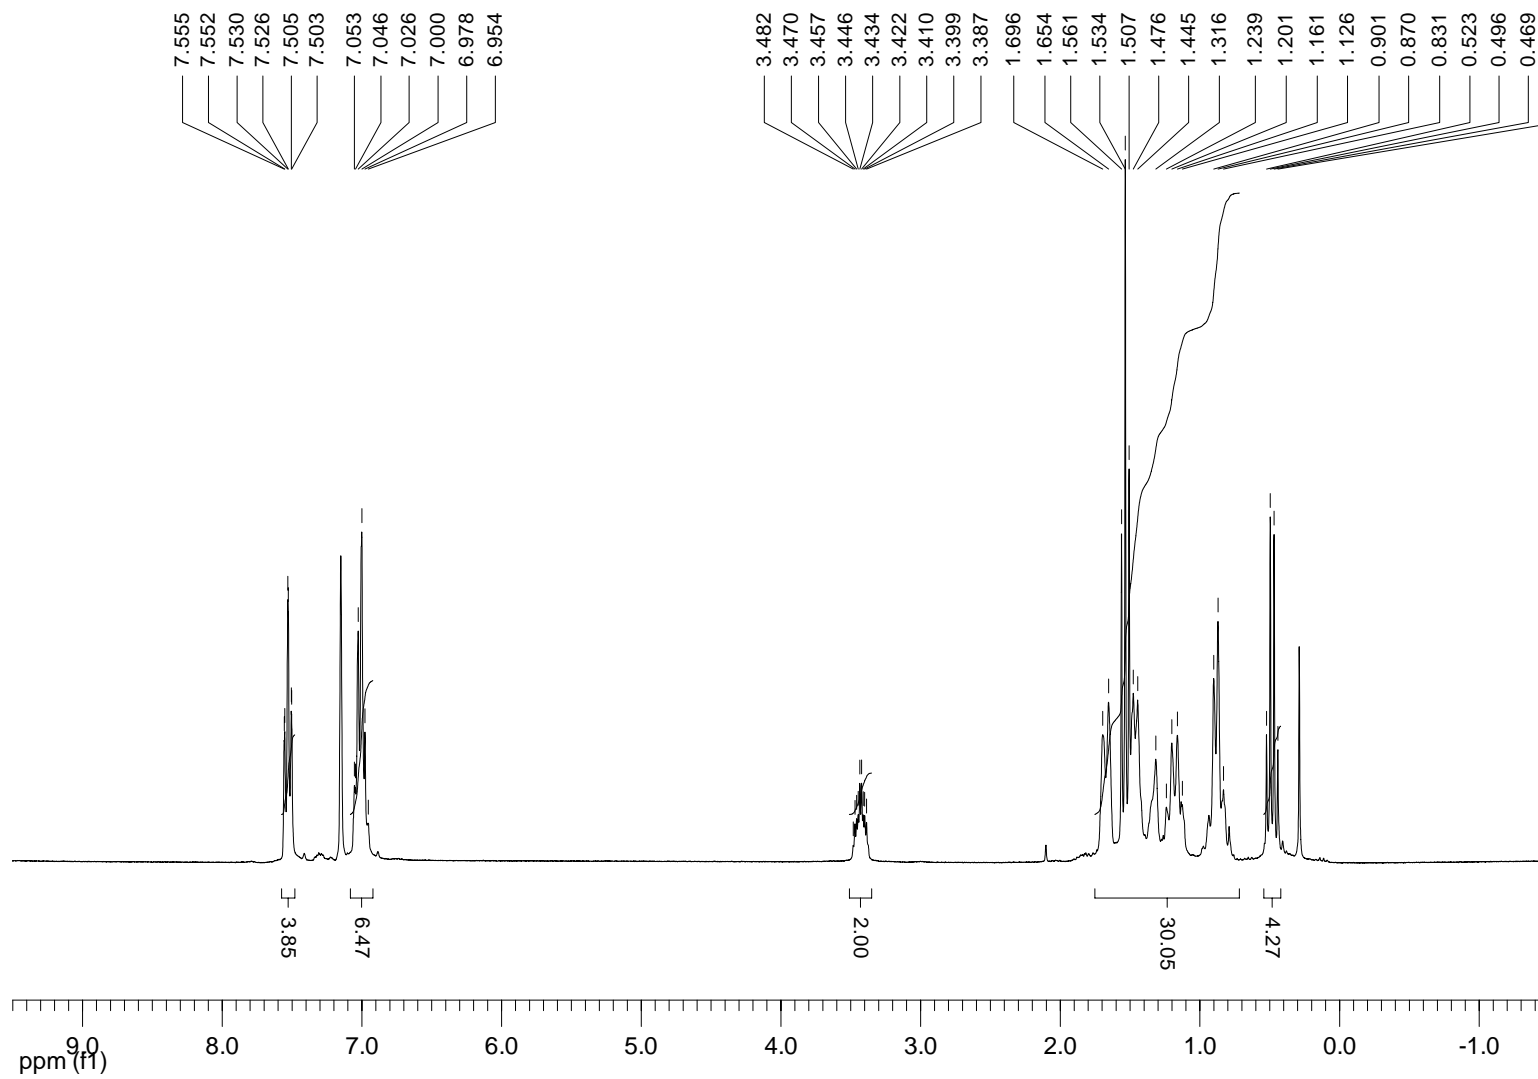



**Figure 6b**  $^{13}\text{C}$  NMR spectrum of  $\text{Al}(\text{Ph}_2\text{PC}\{\text{NCy}\}_2)\text{Et}_2$  (**5b**)

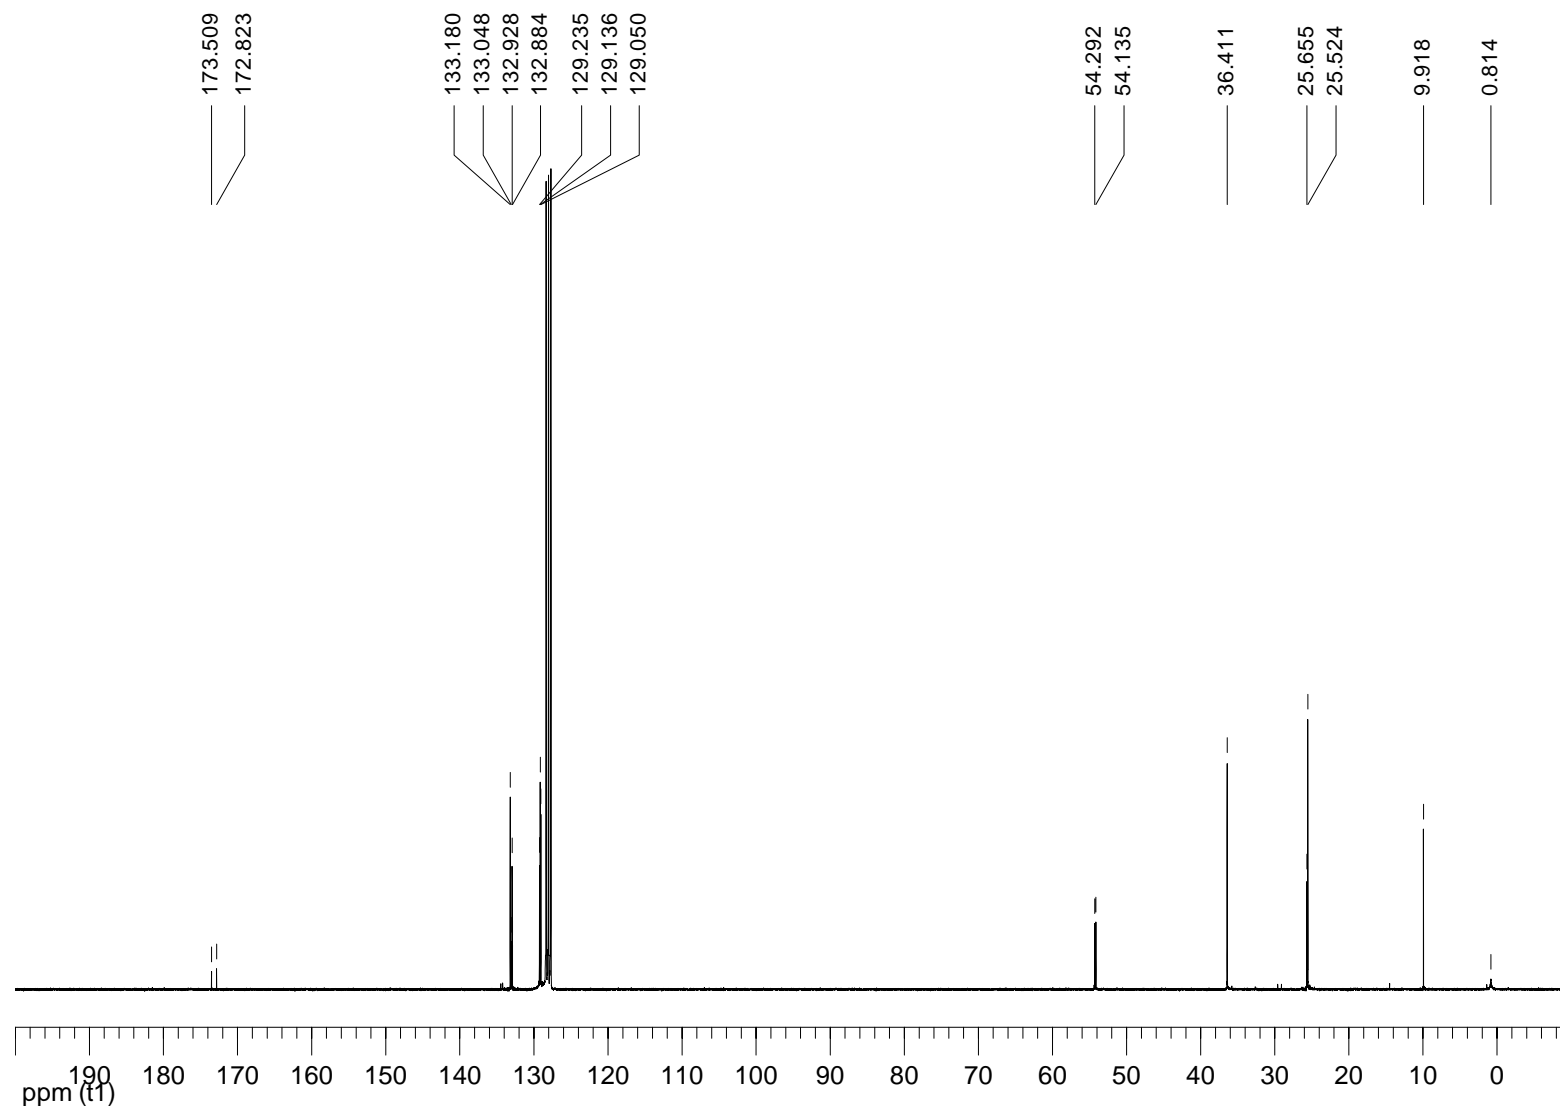

**Figure 6c**  $^{31}\text{P}$  NMR spectrum of  $\text{Al}(\text{Ph}_2\text{PC}\{\text{NCy}\}_2)\text{Et}_2$  (**5b**)

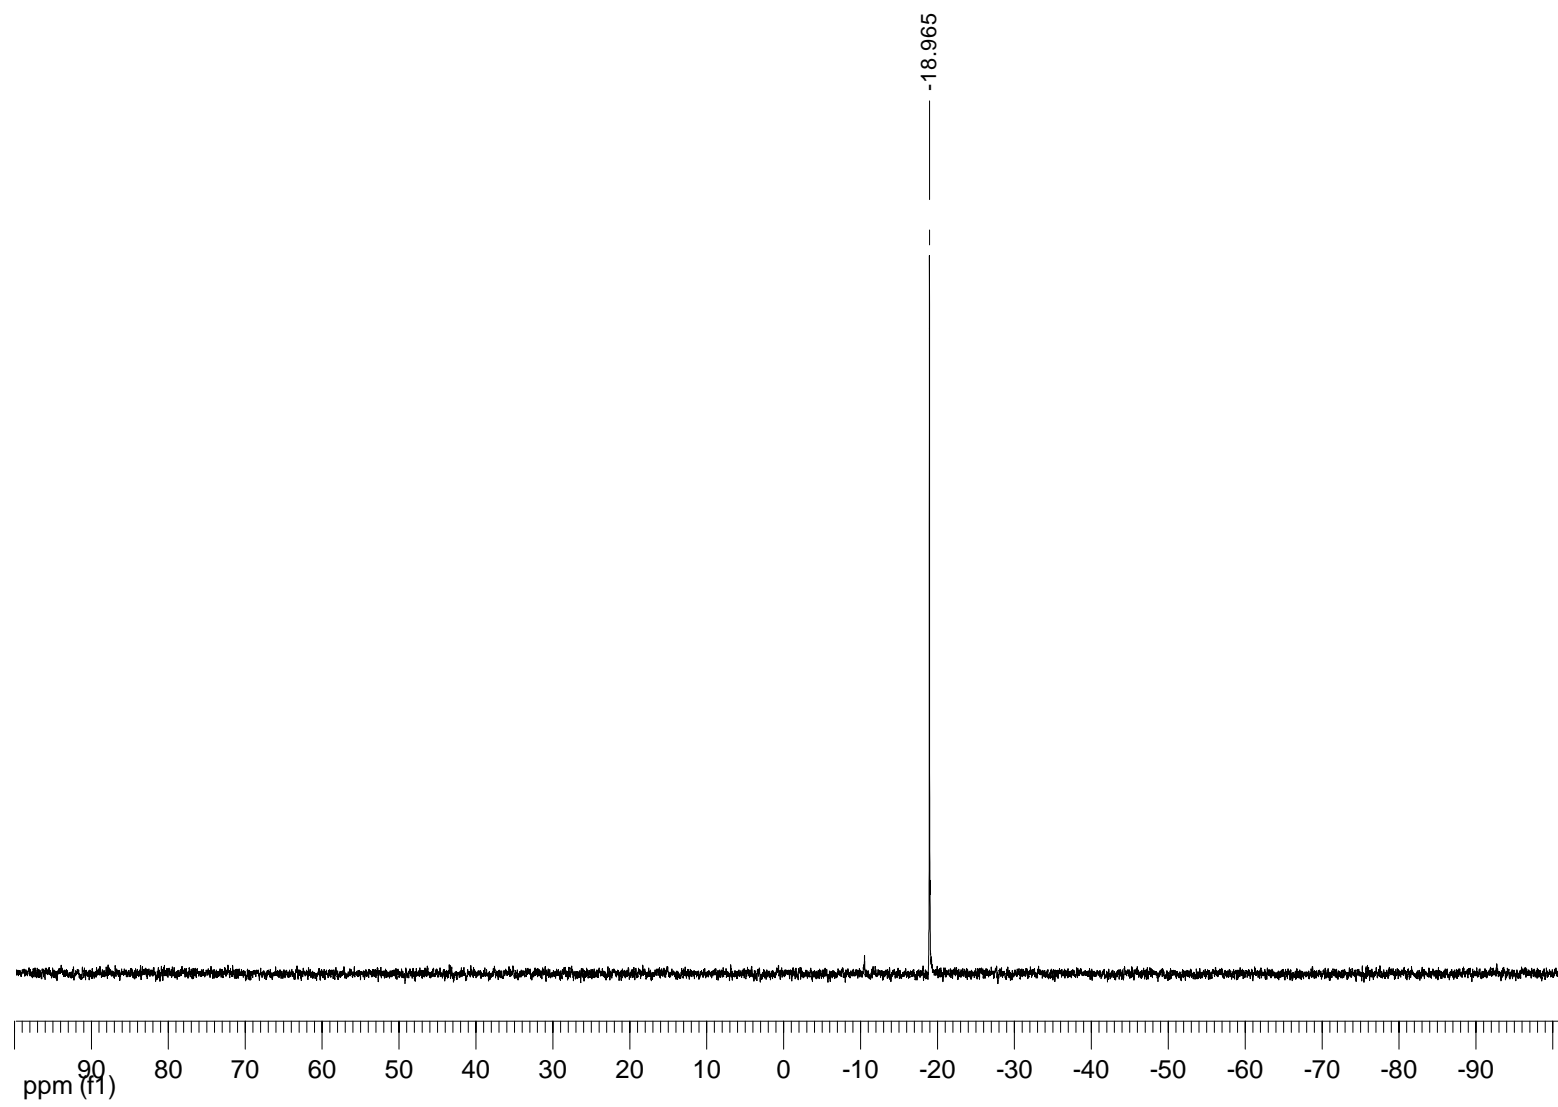

**Figure 7a**  $^1\text{H}$  NMR spectrum of  $\text{Al}(\text{Ph}_2\text{PC}\{\text{N}^i\text{Pr}\}_2)^i\text{Bu}_2$  (**6a**)

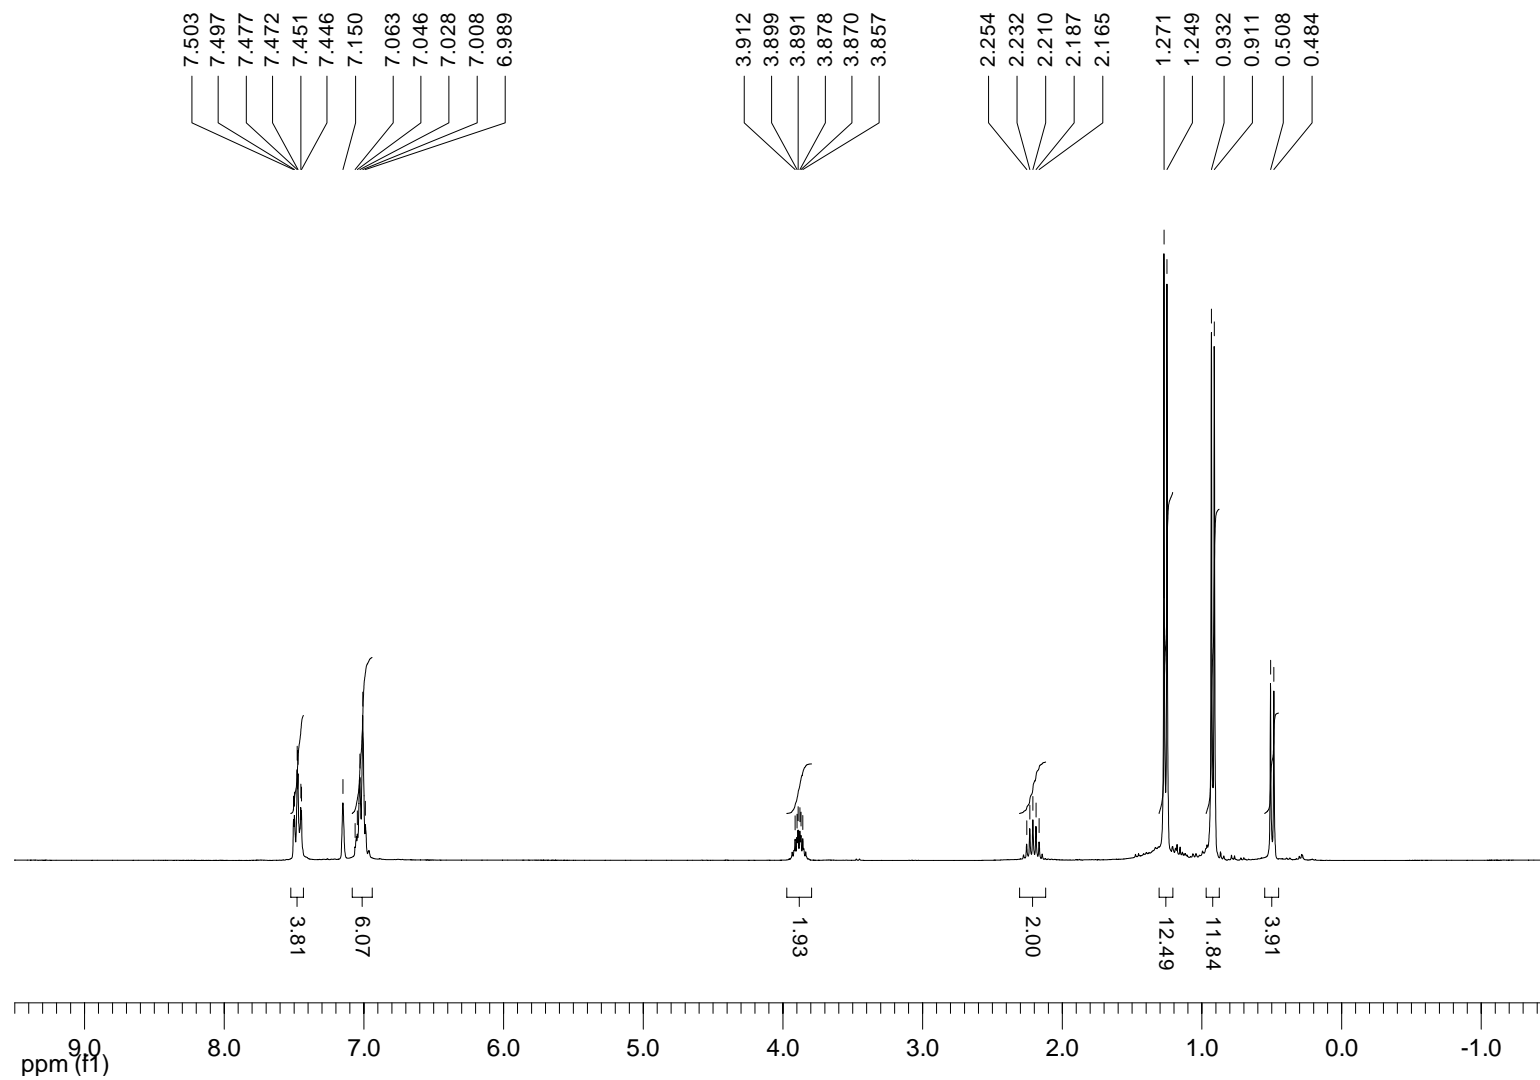

**Figure 7b**  $^{13}\text{C}$  NMR spectrum of  $\text{Al}(\text{Ph}_2\text{PC}\{\text{N}^i\text{Pr}\}_2)^i\text{Bu}_2$  (**6a**)

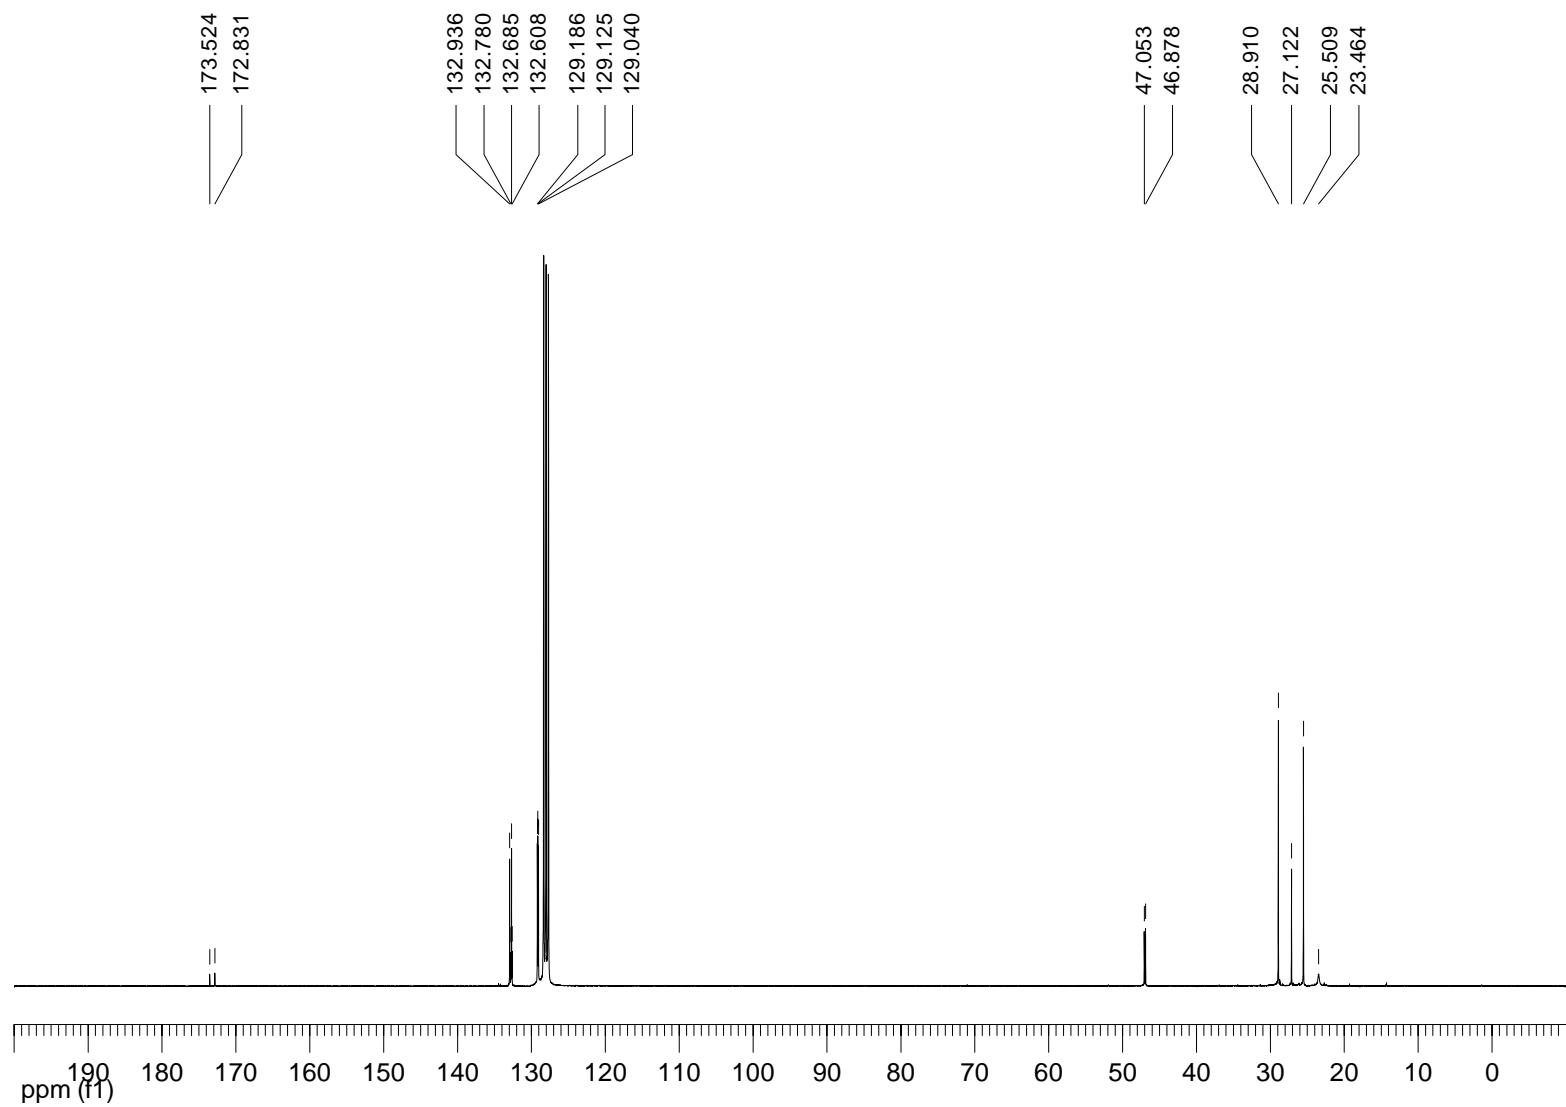

**Figure 7c**  $^{31}\text{P}$  NMR spectrum of  $\text{Al}(\text{Ph}_2\text{PC}(\text{N}^i\text{Pr})_2)^i\text{Bu}_2$  (**6a**)

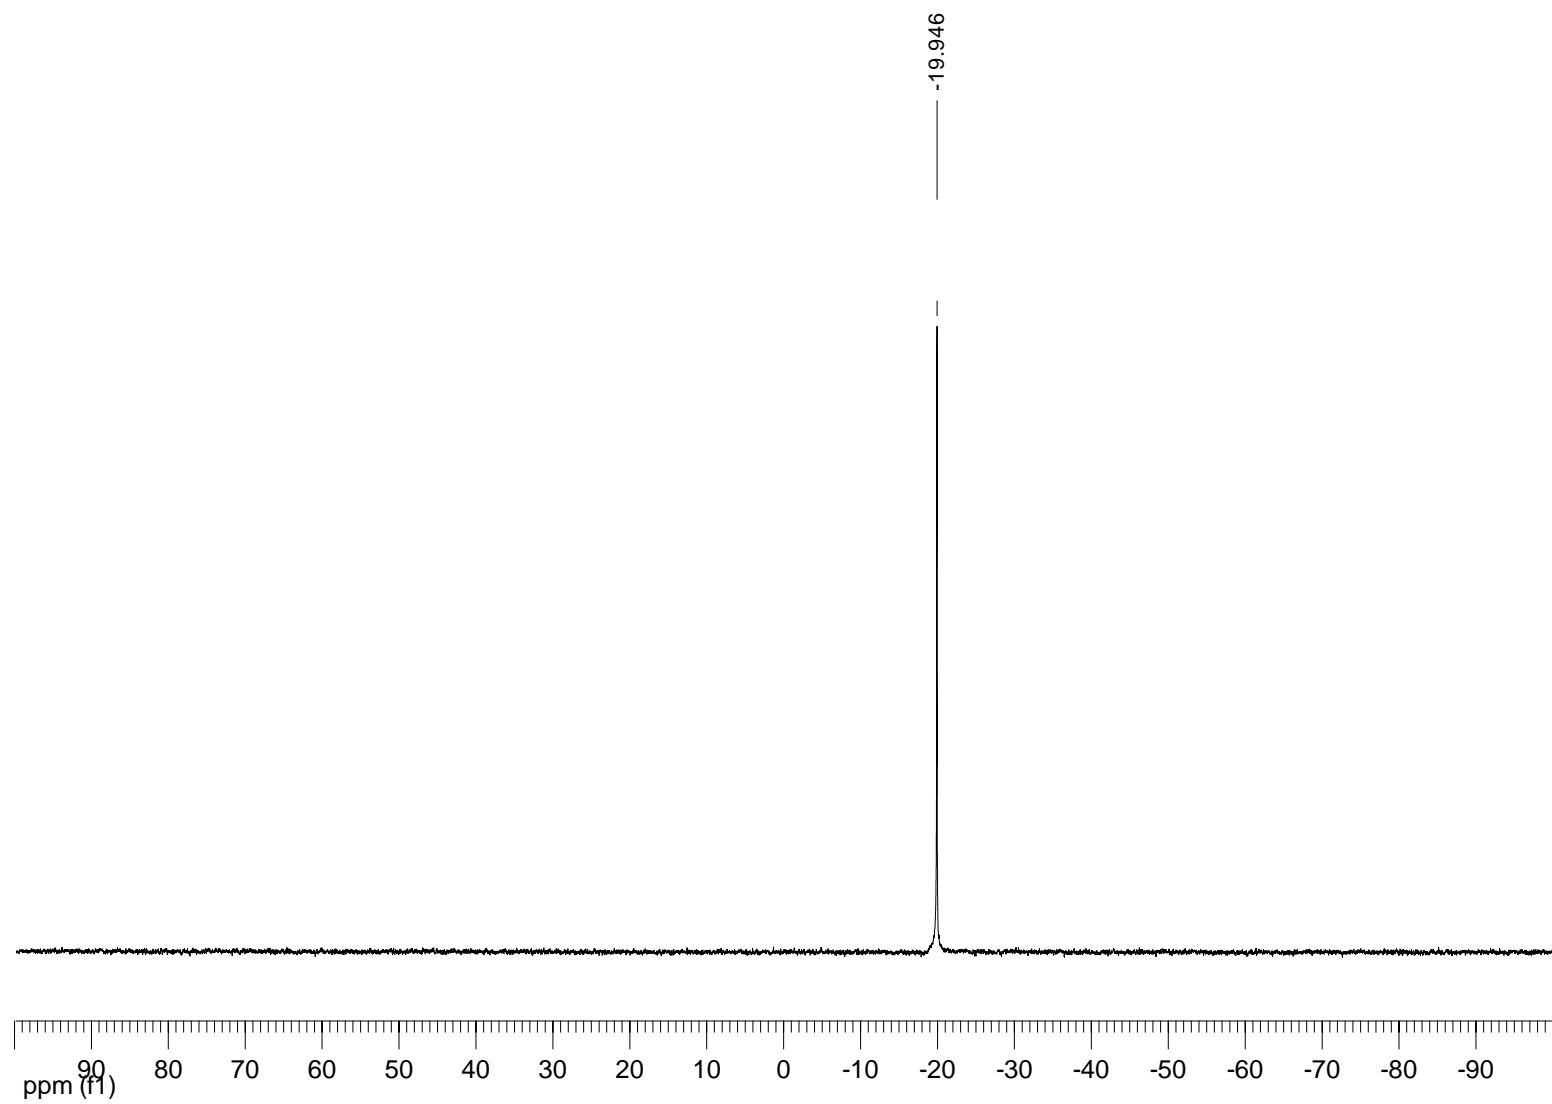

**Figure 8a**  $^1\text{H}$  NMR spectrum of  $\text{Al}(\text{Ph}_2\text{PC}(\text{NCy})_2)_2\text{Bu}_2$  (**6b**)

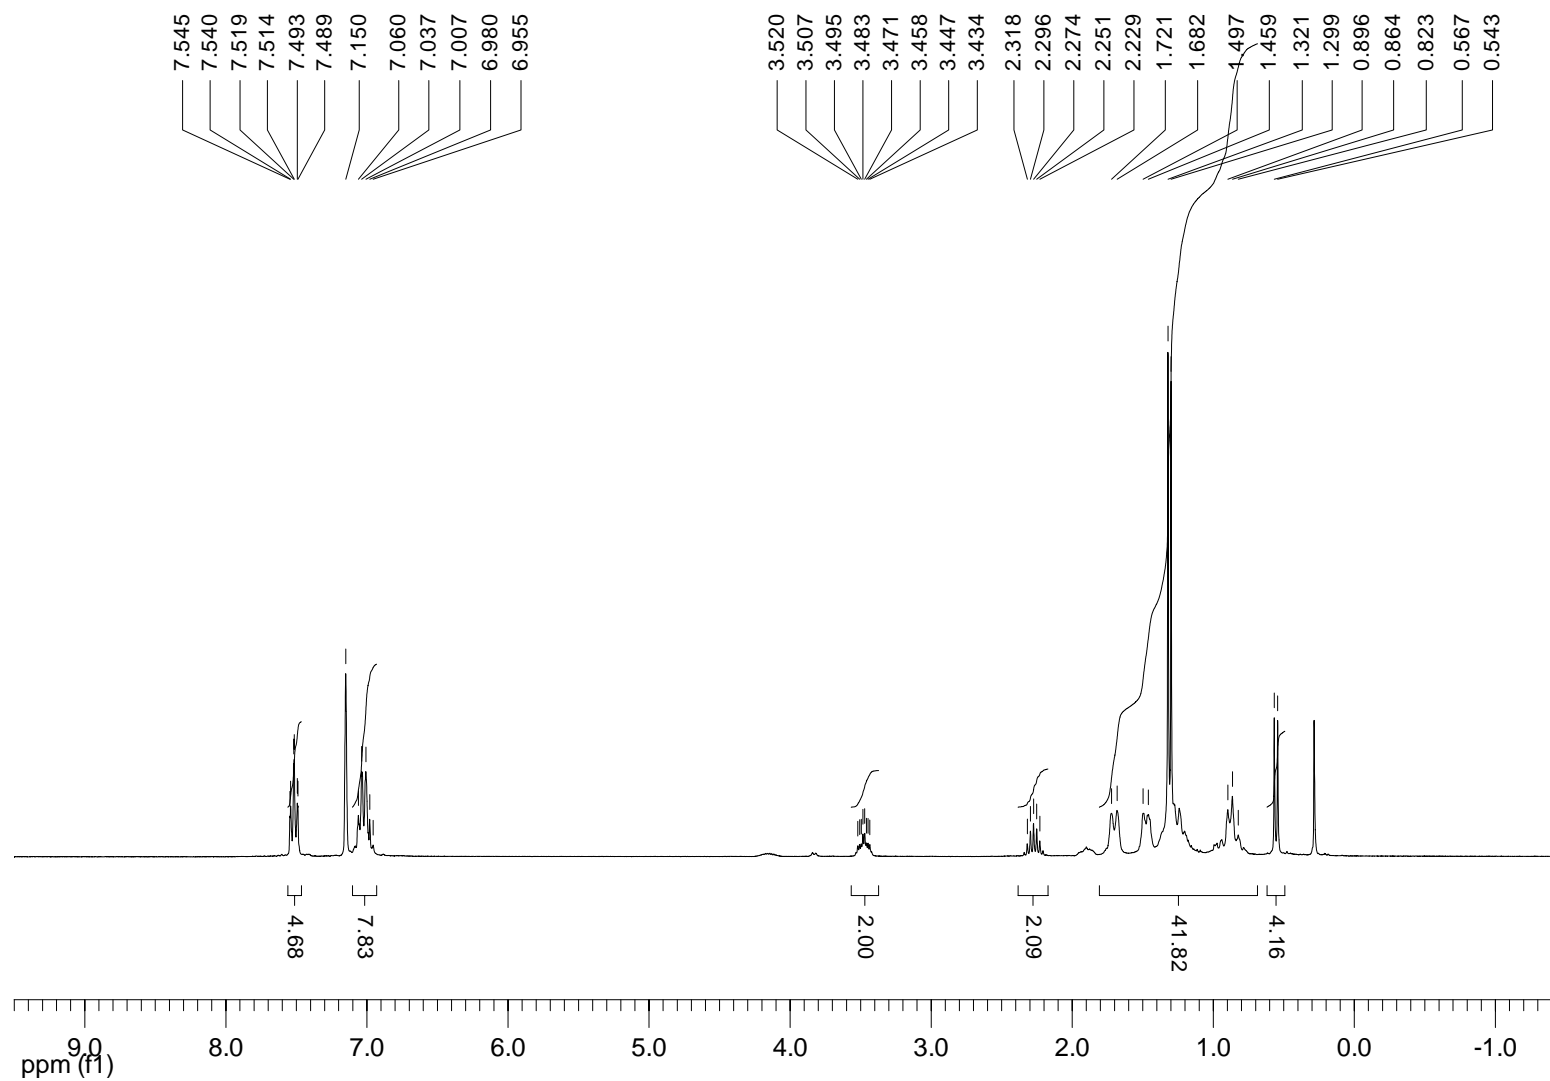

**Figure 8b**  $^{13}\text{C}$  NMR spectrum of  $\text{Al}(\text{Ph}_2\text{PC}\{\text{NCy}\}_2)^i\text{Bu}_2$  (**6b**)

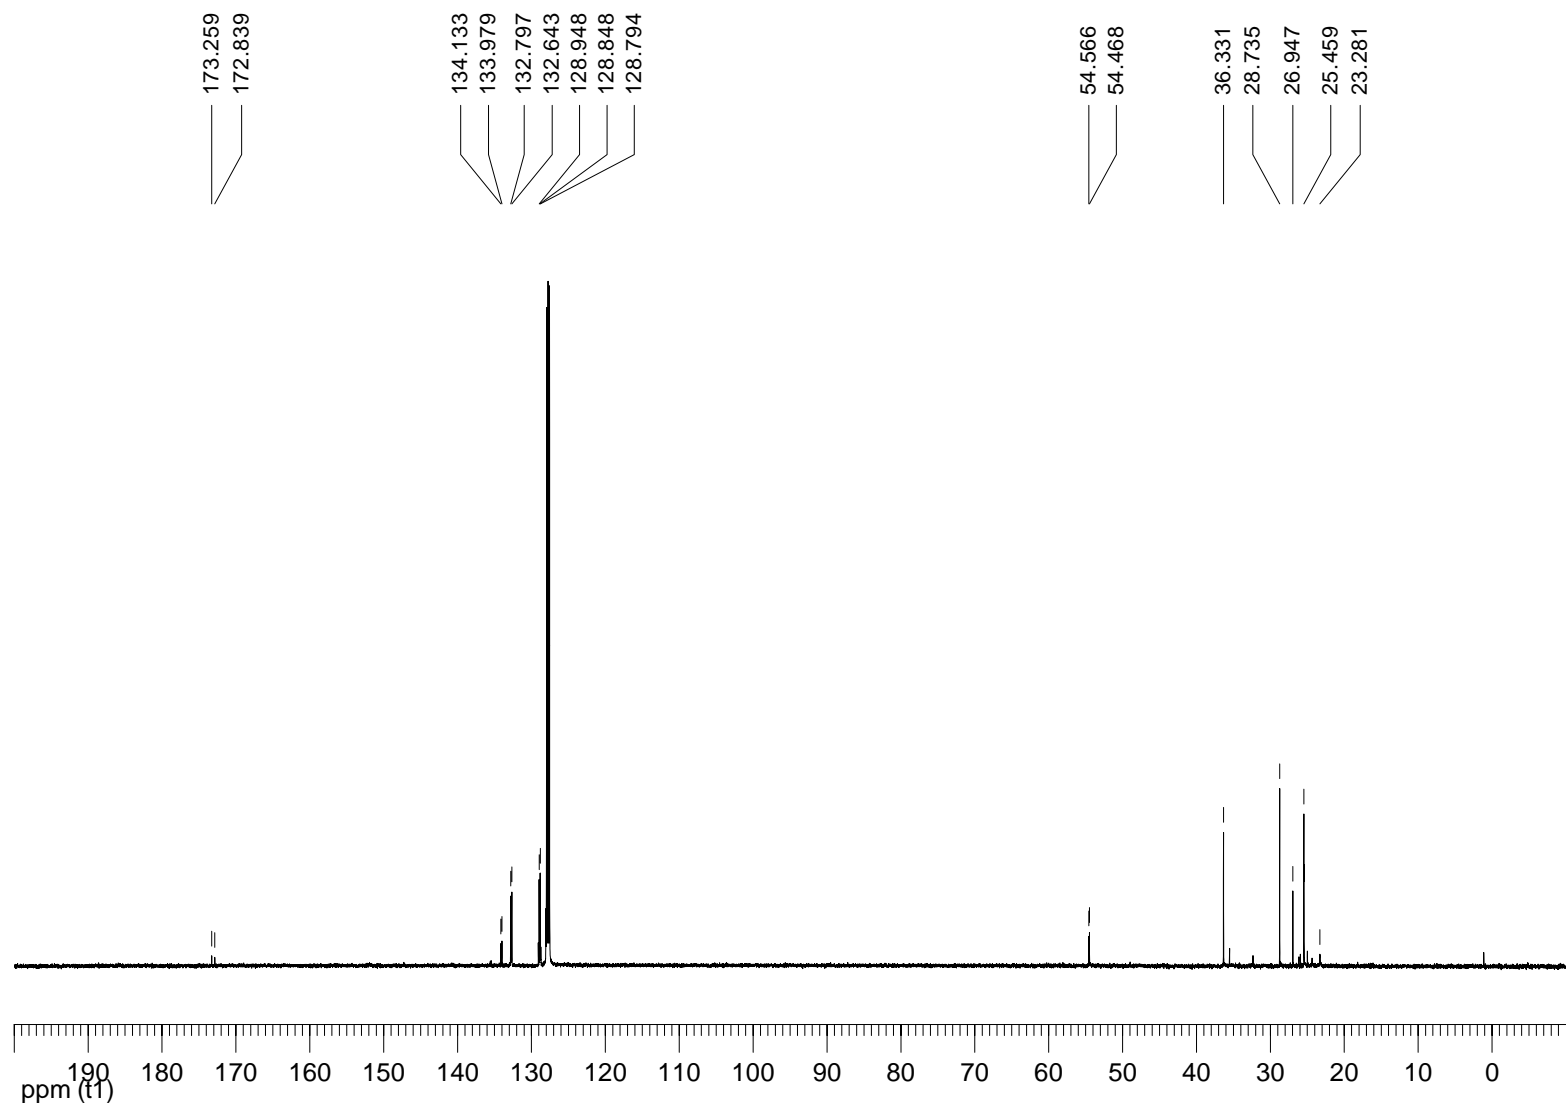

**Figure 8c**  $^{31}\text{P}$  NMR spectrum of  $\text{Al}(\text{Ph}_2\text{PC}(\text{NCy})_2)^i\text{Bu}_2$  (**6b**)

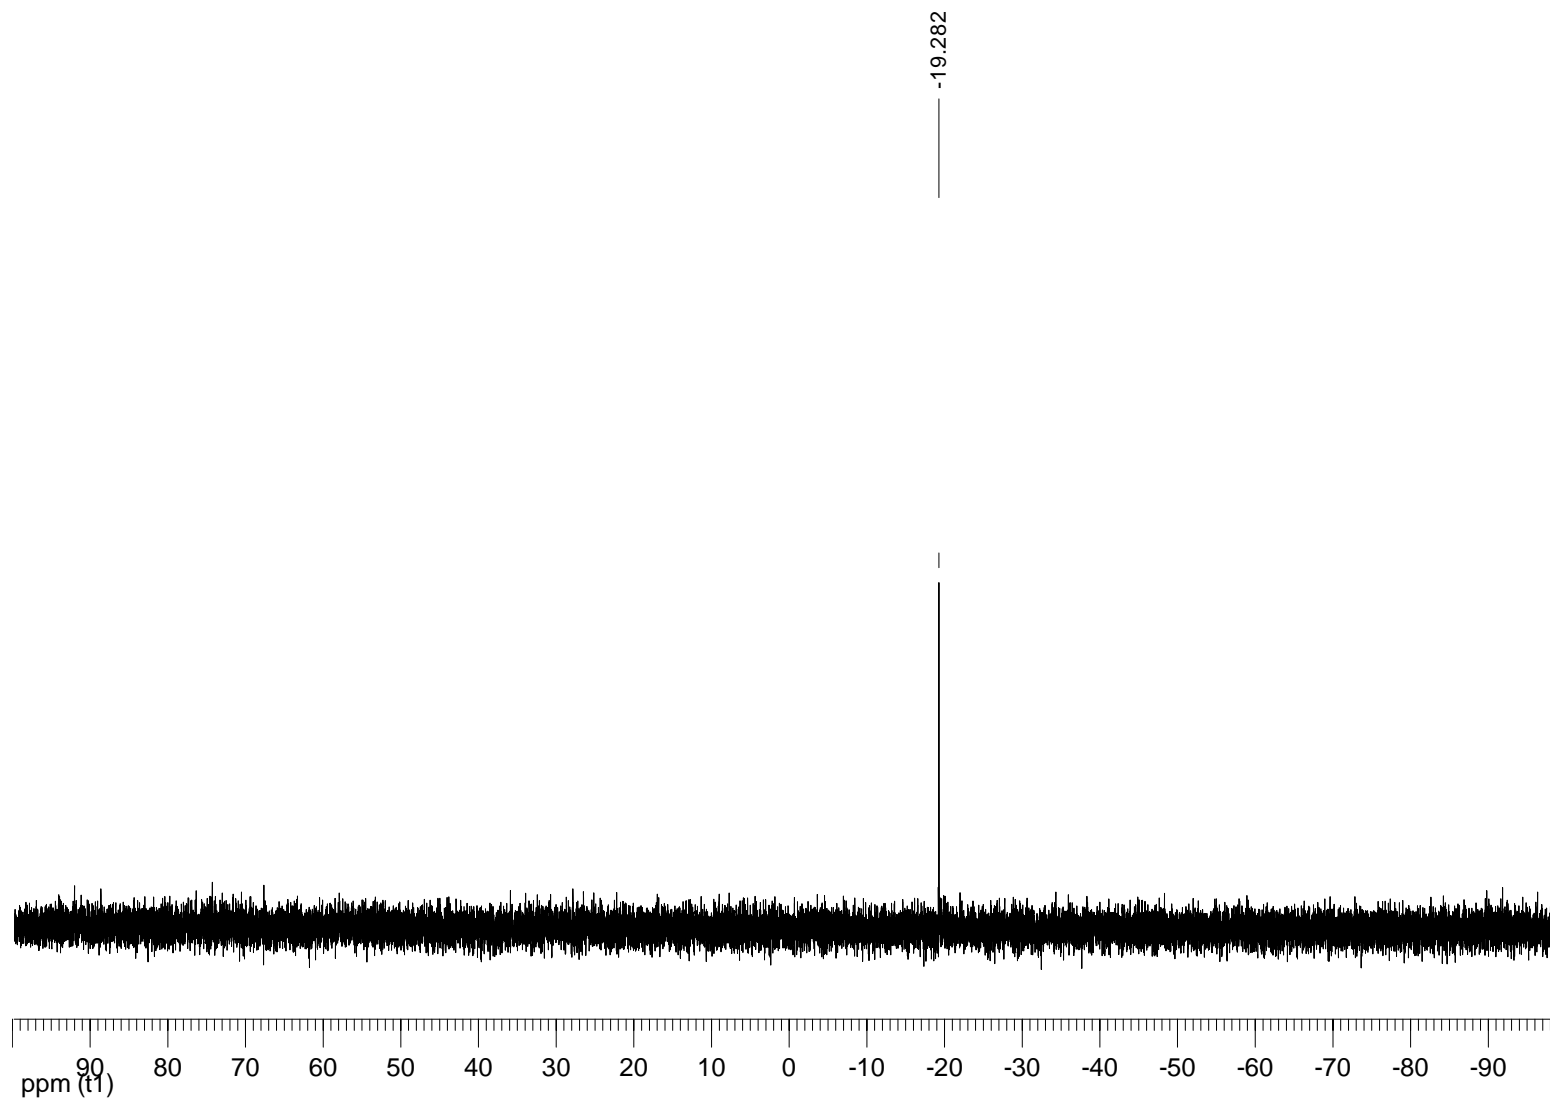



**Figure 9a**  $^1\text{H}$  NMR spectrum of  $\text{Al}(\text{Ph}_2\text{PC}(\text{N}^i\text{Pr})_2)\text{Ph}_2$  (**7a**)

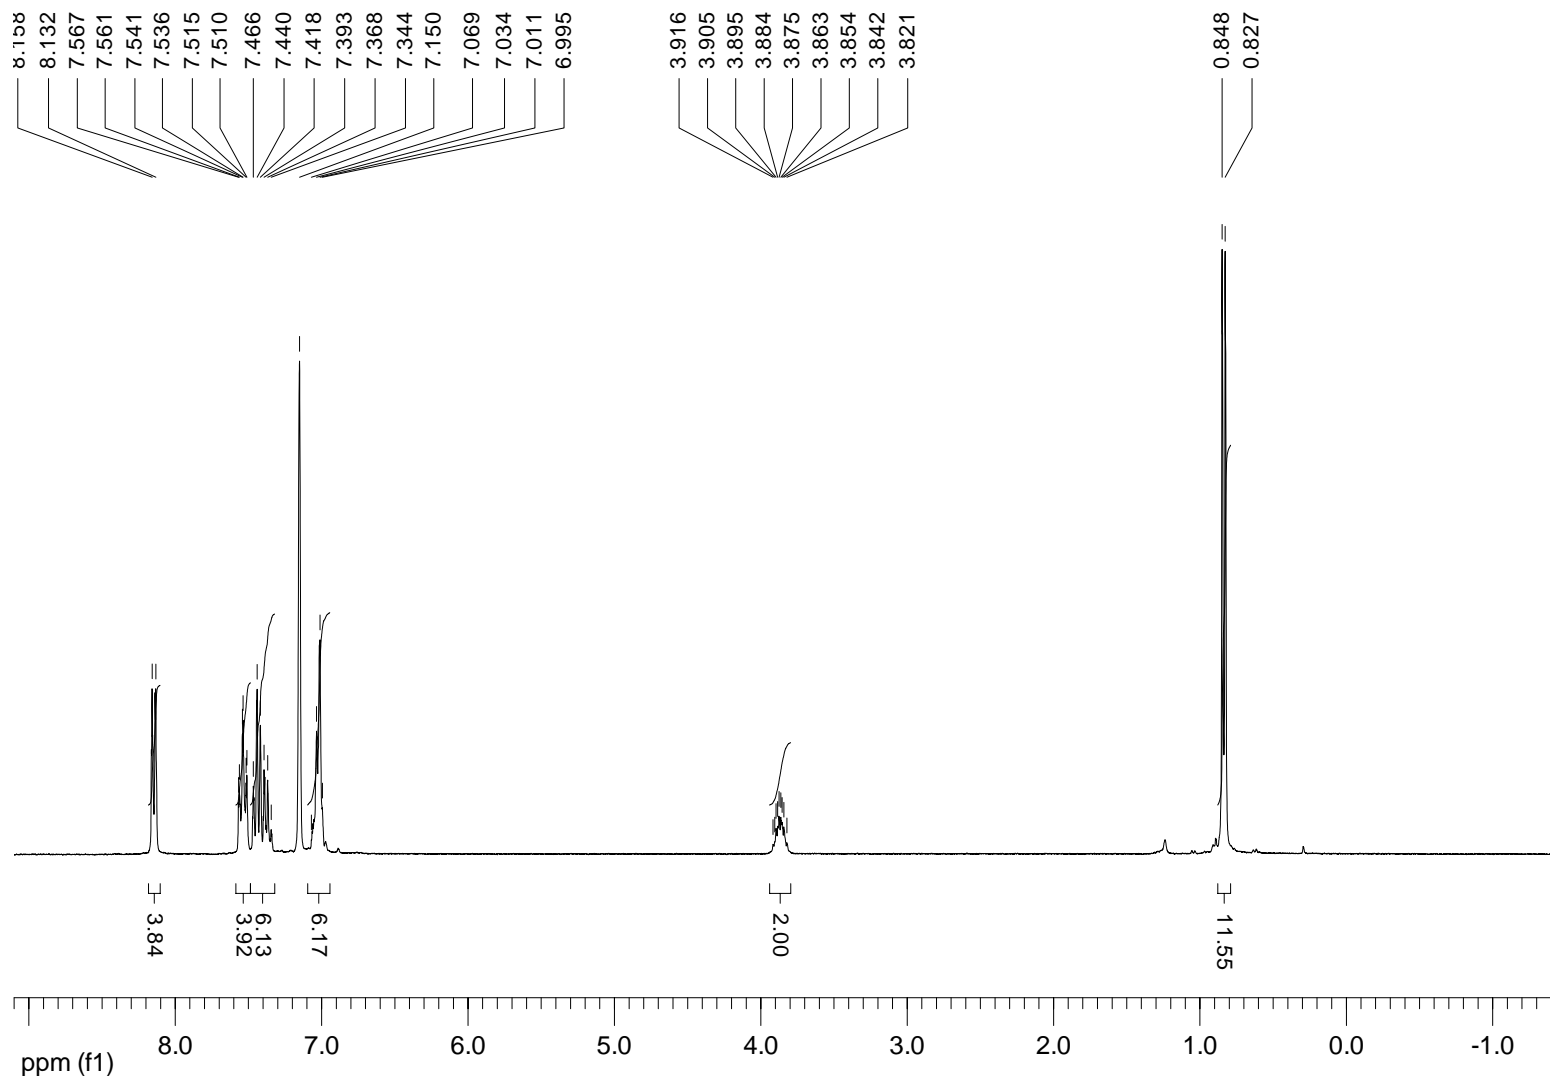

**Figure 9b**  $^{13}\text{C}$  NMR spectrum of  $\text{Al}(\text{Ph}_2\text{PC}\{\text{N}^i\text{Pr}\}_2)\text{Ph}_2$  (**7a**)

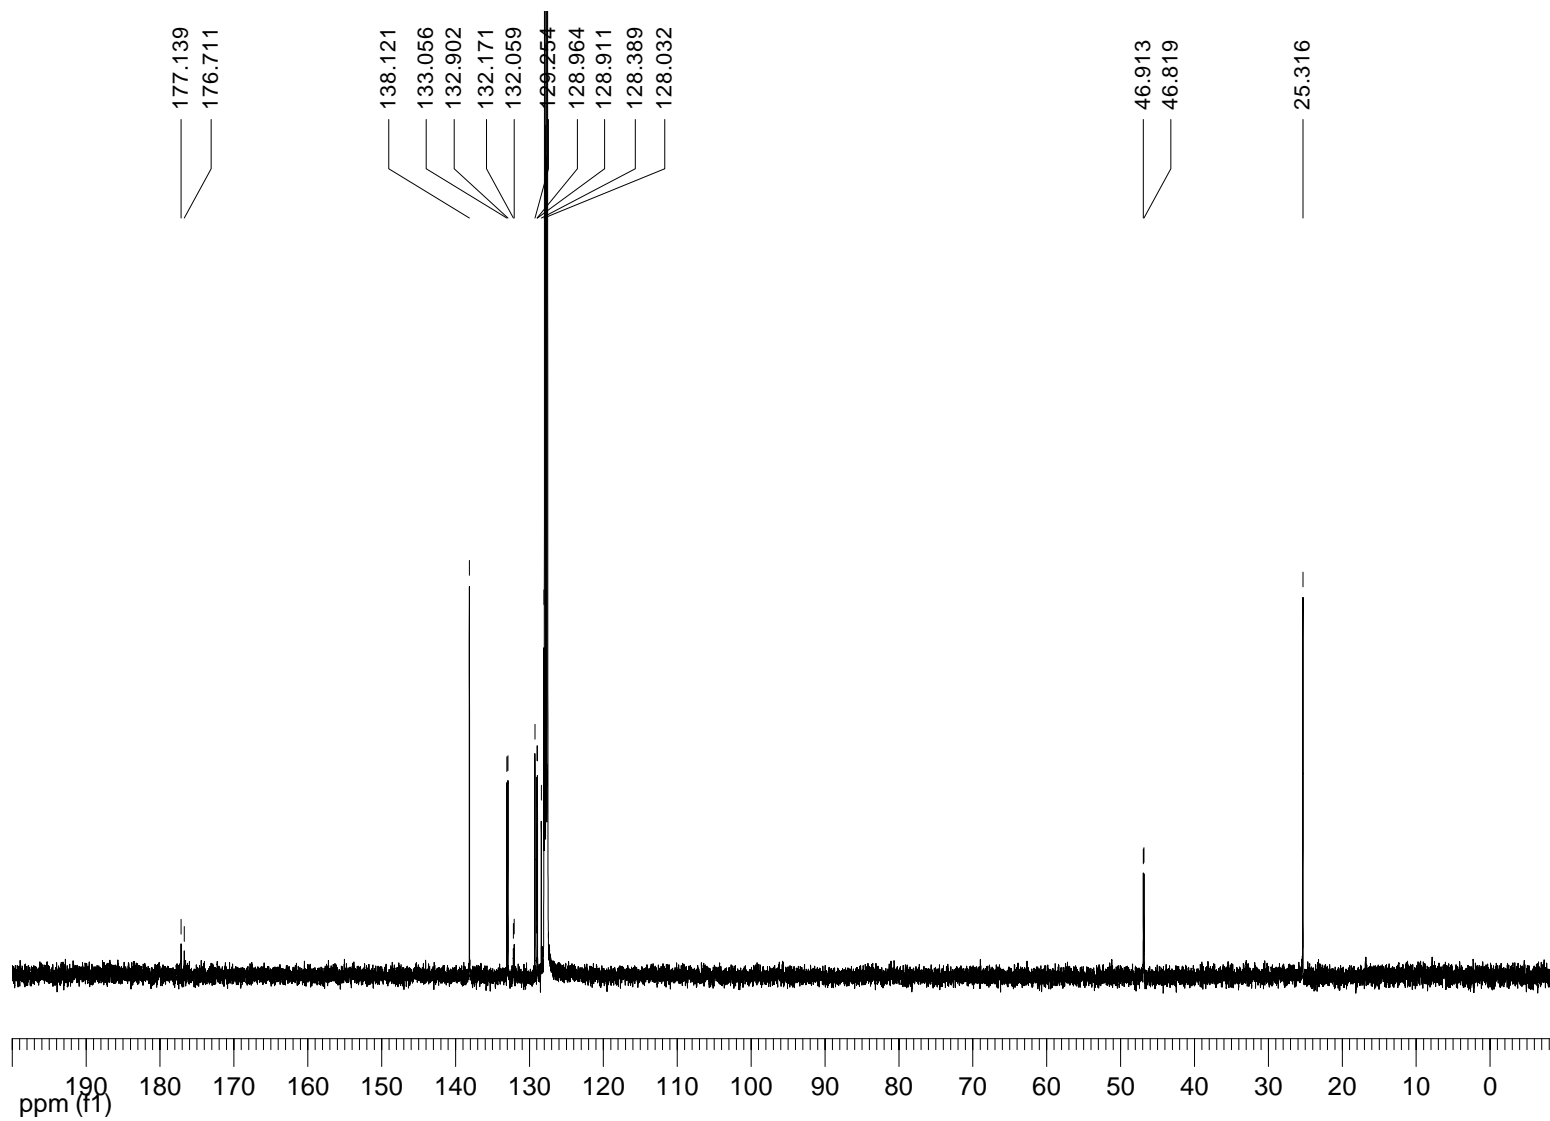

**Figure 9c**  $^{31}\text{P}$  NMR spectrum of  $\text{Al}(\text{Ph}_2\text{PC}\{\text{N}^i\text{Pr}\}_2)\text{Ph}_2$  (**7a**)

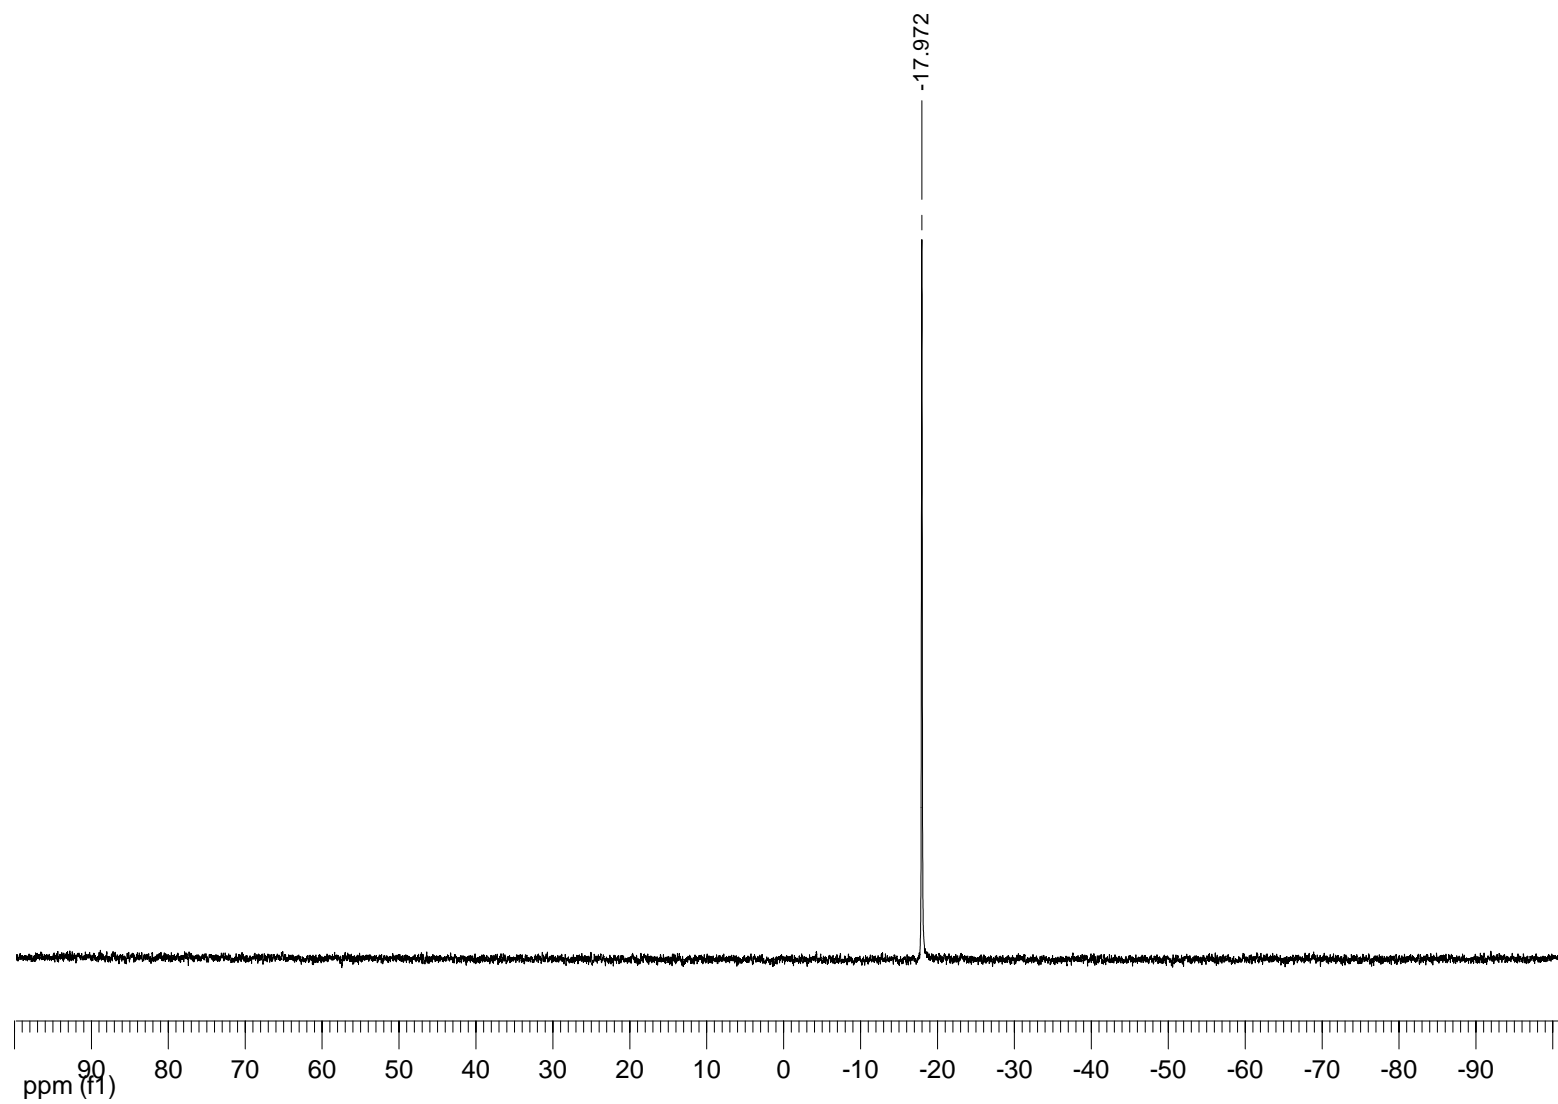

Supplement: b506332a.pdf [file b506332a.pdf]
