# Supplementary figures and images for: Lithium and aluminium complexes supported by chelating phosphaguanidinates
Source: Royal Society of Chemistry journal article supplement (doi:10.1039/b506332a), 2005-01-01

k cal mol<sup>-1</sup>

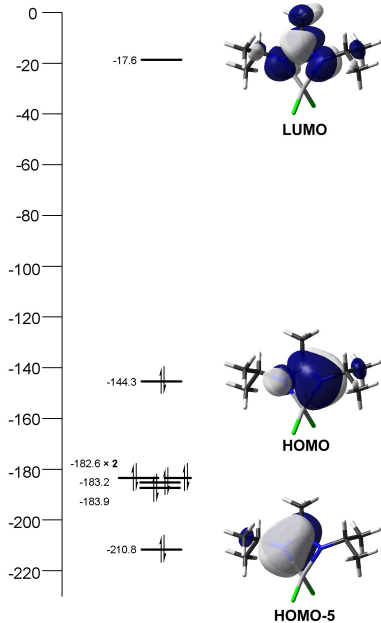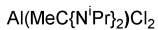

**A**

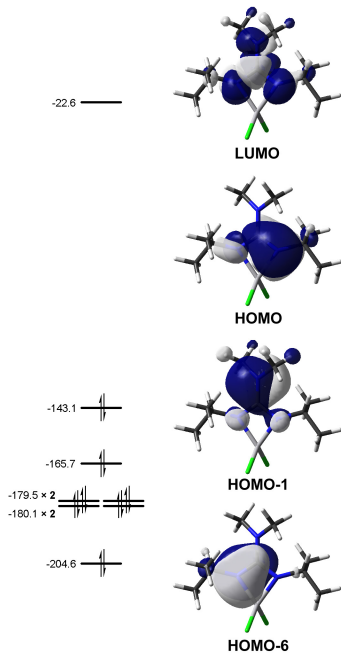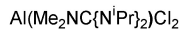

**B**

Supplement: b506332a-figure6.pdf [file b506332a-figure6.pdf]

k cal mol<sup>-1</sup>

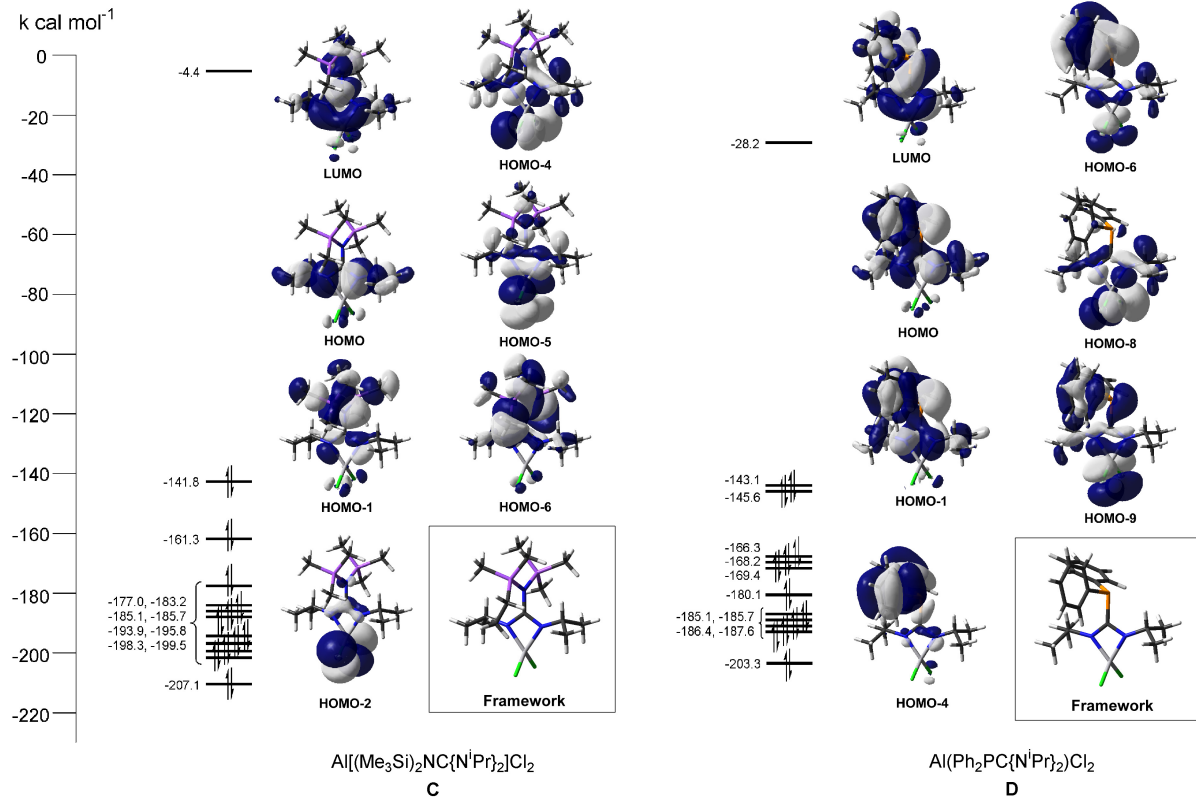

Supplement: b506332a-figure7.pdf [file b506332a-figure7.pdf]
